# Supplementary material
Source: publisher figshare collection journal article supplement (https://acs.figshare.com/ndownloader/files/4692331)
Supplement: Supplementary file 1 [file 4692331]

**Supporting Information for:**

***Molecular Wire Behavior in  $\pi$ -Stacked Donor-Bridge-Acceptor Tertiary Arylureas***

**Tarek A. Zeidan, Qiang Wang, Torsten Fiebig\* and Frederick D. Lewis\***

Email: [lewis@chem.northwestern.edu](mailto:lewis@chem.northwestern.edu), [fiebig@bc.edu](mailto:fiebig@bc.edu)

|                          |    |
|--------------------------|----|
| Synthesis .....          | 2  |
| Absorption Spectra.....  | 8  |
| Transient Spectra .....  | 9  |
| ZINDO Calculations ..... | 12 |
| NMR Spectra .....        | 18 |
| References.....          | 30 |



## GENERAL SYNTHETIC PROCEDURES

**Reaction of Secondary Amine with Phosgene.** The secondary amine was dissolved in dry toluene with triethylamine. The mixture was added dropwise to a stirring solution of 2.5 equiv. of phosgene (20% in toluene) under nitrogen over 10 min. The solution was refluxed for 2 hrs. The reaction mixture was evaporated to dryness and the resulting residue was dissolved in  $\text{CH}_2\text{Cl}_2$ . The organic solution was washed with  $\text{H}_2\text{O}$  and dried over anhydrous  $\text{Na}_2\text{SO}_4$ . The solvent was removed under vacuo and the residue was used for the following step without further purification.

**Addition of *N,N'*-Dimethyl-*p*-phenylenediamine Dihydrochloride or *N*-Methylaniline.** The acyl chloride was dissolved in dry toluene with triethylamine. The mixture was added slowly to a refluxing solution of *N,N'*-dimethylphenylenediamine dihydrochloride (or *N*-methylaniline) with triethylamine in toluene over 1 hr. The reaction was refluxed for another 10 min. The reaction mixture was evaporated to dryness and the resulting residue was dissolved in  $\text{CH}_2\text{Cl}_2$ . The organic solution was washed with  $\text{H}_2\text{O}$  and dried over anhydrous  $\text{Na}_2\text{SO}_4$ . The solvent was removed under vacuo and the residue was used for the following step without further purification.

**Methylation.** The urea was dissolved in dry DMF under nitrogen. NaH was washed with hexanes before usage. A suspension of NaH in dry DMF was added in portions to the urea solution followed with addition of MeI with every portion over 20 min. The mixture was left stirring under nitrogen for another 3 hrs. Water was added to the reaction mixture to precipitate the product. The off-white solid was filtered, dissolved in  $\text{CH}_2\text{Cl}_2$  and dried over anhydrous  $\text{Na}_2\text{SO}_4$ . The solvent was removed under vacuo.

## EXPERIMENTAL SECTION

**General.**  $^1\text{H}$  NMR spectra were measured at 400 or 500 MHz in  $\text{CDCl}_3$  solution with TMS as internal standard. Chemical shifts ( $\delta$ ) are quoted in parts per million.  $J$  values are given in hertz. UV–VIS spectra were measured on a diode array spectrometer using a 1 cm path length quartz cell. Emission spectra are uncorrected, and the estimated error for the quantum yields is  $\pm 10\%$ .

Ground state structures were optimized with the AM1 method implemented in MOPAC as implemented in CAChe 6.1.10.<sup>2</sup> Electronic structure calculations were performed on a PC with the ZINDO Hamiltonian (26 occupied and 26 unoccupied orbitals) as implemented in CAChe 6.1.10. All data-fitting procedures were carried out by using Origin (version 6.1).<sup>3</sup>

**Materials.** Phosgene (20% solution in toluene), triethylamine, 1-aminopyrene, *p*-phenylenediamine, sodium hydride and methyl iodide are commercially available and used as received. All solvents used for spectroscopy were spectrograde. The preparation of *N,N'*-dimethyl-*p*-phenylenediamine dihydrochloride has been previously described.<sup>1</sup>

**1-(4-Dimethylamino-phenyl)-1,3-dimethyl-3-pyren-1-yl-urea (1).** 25% overall-yield. mp 141-143 °C;  $^1\text{H}$  NMR ( $\text{CDCl}_3$ , 500 MHz):  $\delta$  8.10 (dd,  $J = 7.5, 2.0$  Hz, 2H), 7.99-7.83 (m, 6H), 7.45 (d,  $J = 8.0$  Hz, 1H), 6.15 (d,  $J = 8.5$  Hz, 2H), 5.64 (d,  $J = 9.0$  Hz, 2H), 3.43 (s, 3H), 3.14 (s, 3H), 2.09 (s, 6H);  $^{13}\text{C}$  NMR ( $\text{CDCl}_3$ , 100 MHz):  $\delta$  162.7, 148.1, 140.1, 134.1, 131.2, 131.1, 129.9, 127.3, 127.2, 127.1, 126.1, 125.9, 125.4, 125.2, 112.6, 40.6, 40.4, 40.3. HRMS (EI) calcd for  $\text{C}_{27}\text{H}_{25}\text{O}_1\text{N}_3$ : 407.1992; found 407.1993.

**1-(4-Dimethylamino-phenyl)-3-[4-(1,3-dimethyl-3-pyren-1-yl-ureido)-phenyl]-1,3-dimethyl-urea (2).** 10% overall-yield. mp 186-190 °C;  $^1\text{H}$  NMR ( $\text{CDCl}_3$ , 400 MHz):  $\delta$

8.12-7.82 (m, 7H), 7.75 (d,  $J = 8.8$ , 1H), 7.45 (d,  $J = 8.8$  Hz, 1H), 6.26 (d,  $J = 8.8$  Hz, 2H), 6.17 (d,  $J = 8.8$  Hz, 2H), 6.07 (d,  $J = 8.0$  Hz, 2H), 5.80 (d,  $J = 8.8$  Hz, 2H), 3.42 (s, 3H), 3.10 (s, 3H), 2.86 (s, 3H), 2.73 (s, 6H);  $^{13}\text{C}$  NMR ( $\text{CDCl}_3$ , 100 MHz):  $\delta$  162.1, 161.3, 148.3, 142.8, 141.5, 139.4, 135.0, 131.1, 130.9, 129.9, 127.5, 127.2, 126.4, 126.2, 125.9, 125.6, 125.4, 125.2, 125.0, 124.5, 122.7, 112.5, 40.9, 40.4, 40.1, 39.8, 38.5. HRMS (EI) calcd for  $\text{C}_{36}\text{H}_{35}\text{O}_2\text{N}_5$ : 569.2785; found 569.2789.

**Urea 3.** 2% overall-yield. mp 188-193 °C;  $^1\text{H}$  NMR ( $\text{CDCl}_3$ , 500 MHz):  $\delta$  8.10 (dd,  $J = 7.0$  Hz, 2H), 7.96 (d,  $J = 8.0$  Hz, 2H), 7.91-7.83 (m, 3H), 7.74 (d,  $J = 9.0$  Hz, 1H), 7.45 (d,  $J = 8.0$  Hz, 1H), 6.46 (d,  $J = 9.0$  Hz, 1H), 6.43 (d,  $J = 8.5$  Hz, 1H), 6.30 (m, 2H), 6.17-6.06 (m, 6H), 6.80 (d,  $J = 8.5$  Hz, 2H) 3.40 (s, 3H), 3.03 (s, 6H), 2.91 (s, 3H), 2.80 (s, 3H), 2.76 (s, 3H), 2.66 (s, 3H), 1.88 (s, 3H);  $^{13}\text{C}$  NMR ( $\text{CDCl}_3$ , 100 MHz):  $\delta$  162.7, 142.9, 142.4, 142.0, 139.3.1, 131.1, 131.0, 130.8, 129.8, 129.0, 127.5, 127.3, 127.1, 127.0, 126.6, 126.4, 126.1, 125.8, 125.6, 125.4, 125.0, 124.4, 122.6, 112.3, 40.4, 40.3, 40.2, 39.9, 39.6, 39.0, 38.7, 38.4. HRMS (EI) calcd for  $\text{C}_{45}\text{H}_{45}\text{O}_3\text{N}_7$ : 731.3578; found 731.3579.

**Urea 4.** 1.5% overall-yield. mp 190-194 °C;  $^1\text{H}$  NMR ( $\text{CDCl}_3$ , 500 MHz):  $\delta$  8.11-7.83 (m, 7H), 7.73 (d,  $J = 9.0$  Hz, 1H), 7.45 (d,  $J = 8.0$  Hz, 1H), 6.53 (d,  $J = 9.0$  Hz, 1H), 6.45 (d,  $J = 8.5$  Hz, 1H), 6.43-6.09 (m, 12H), 6.77 (d,  $J = 8.0$  Hz, 2H), 3.39 (s, 3H), 3.05 (m, 6H), 3.01 (s, 3H), 2.93 (s, 3H), 2.90 (s, 3H), 2.78 (s, 3H), 2.69 (s, 3H), 2.68 (s, 3H);  $^{13}\text{C}$  NMR ( $\text{CDCl}_3$ , 100 MHz):  $\delta$  161.9, 161.5, 160.9, 160.6, 143.1, 142.4, 142.3, 142.1, 141.8, 139.3, 131.1, 130.8, 129.9, 127.5, 127.3, 127.1, 127.0, 126.8, 126.6, 126.5, 126.1, 126.0, 125.9, 125.8, 125.7, 125.6, 125.5, 125.2, 125.0, 124.4, 122.6, 112.9, 112.5, 41.0, 40.5,

40.2, 40.1, 40.0, 39.6, 39.5, 39.2, 38.4, 31.1. HRMS (EI) calcd for C<sub>54</sub>H<sub>55</sub>O<sub>4</sub>N<sub>9</sub>: 893.4372; found 893.4347.

**Urea 5.** 1% overall-yield. mp 108-111 °C; <sup>1</sup>H NMR (CDCl<sub>3</sub>, 500 MHz): δ 8.10-7.81 (m, 7H), 7.72 (d, *J* = 9 Hz, 1H), 7.44 (d, *J* = 7.5 Hz, 2H), 6.54-6.07 (m, 18H), 5.76 (d, *J* = 8.0 Hz, 2H), 3.38 (s, 3H), 3.05-2.89 (m, 21H), 2.78 (s, 3H), 2.67 (s, 3H), 1.87 (s, 3H); <sup>13</sup>C NMR (CDCl<sub>3</sub>, 100 MHz): δ 161.9, 161.5, 160.9, 160.8, 160.5, 143.1, 142.5, 142.4, 142.3, 142.1, 141.8, 139.3, 135.8, 131.1, 130.8, 129.8, 127.5, 127.3, 127.1, 127.0, 126.8, 126.6, 126.5, 126.0, 125.9, 125.9, 125.8, 125.7, 125.5, 125.2, 125.0, 124.4, 122.6, 112.6, 41.2, 40.5, 40.2, 40.1, 40.0, 39.5, 39.4, 39.2, 38.4, 31.2. MS (EI) for C<sub>63</sub>H<sub>65</sub>O<sub>5</sub>N<sub>11</sub>: found 1055.2.

**Urea 6.** 15% overall-yield. mp 232-236 °C; <sup>1</sup>H NMR (CDCl<sub>3</sub>, 500 MHz): δ 8.10-7.82 (m, 7H); 7.73 (d, *J* = 9 Hz, 1H); 7.44 (d, *J* = 8 Hz, 1H); 6.94-6.84 (m, 3H), 6.65 (d, *J* = 7.5 Hz, 2H), 6.28 (d, *J* = 7.5 Hz, 2H), 6.13 (d, *J* = 8.0 Hz, 2H), 6.08 (d, *J* = 8.0 Hz, 2H), 5.78 (d, *J* = 7.5 Hz, 2H), 3.39 (s, 3H), 3.08 (s, 3H), 3.04 (s, 3H), 2.96 (s, 3H), 2.74 (s, 3H), 1.89 (s, 3H); <sup>13</sup>C NMR (CDCl<sub>3</sub>, 100 MHz): δ 161.9, 161.1, 160.6, 145.6, 142.4, 142.3, 142.2, 141.8, 139.4, 131.1, 130.8, 129.8, 128.8, 127.5, 126.8, 126.6, 126.0, 125.9, 125.8, 125.2, 125.1, 124.4, 40.5, 40.2, 39.6, 39.5, 39.2, 39.4. HRMS (EI) calcd for C<sub>43</sub>H<sub>40</sub>O<sub>3</sub>N<sub>6</sub>: 688.3150; found 688.3156.

**Femtosecond broadband pump-probe spectroscopy.** A detailed description of our experimental setup has been given elsewhere.<sup>4</sup> The pump wavelength was set to 355 nm for all ureas. The changes in optical density were probed by a femtosecond white-light continuum (WLC) generated by tight focusing of a small fraction of the output of a commercial Ti:Sp based pump laser (CPA-2010, Clark-MXR) into a 3 mm calcium

fluoride ( $\text{CaF}_2$ ) plate. The WLC provides a usable probe source between 300 and 750 nm. The WLC was split into two beams (probe and reference) and focused into the sample using reflective optics. After passing through the sample both probe and reference beams were spectrally dispersed and simultaneously detected on a CCD sensor. The pump pulse (1 kHz, 400 nJ) was generated by frequency doubling of the compressed output of a home-built NOPA system (from 666 nm to 708 nm respectively, 7  $\mu\text{J}$ , 40 fs). To compensate for group velocity dispersion in the UV-pulse an additional prism compressor was used. The overall time resolution of the setup is determined by the cross correlation function between pump and probe pulses which is typically 100–120 fs (fwhm, assuming a Gaussian lineshape). A spectral resolution of 5-7 nm was obtained. All measurements were performed with magic angle ( $54.7^\circ$ ) setting for the polarization of pump with respect to the polarization of the probe pulse. A sample cell with 1.25 mm fused silica windows and an optical path of 1 mm was used for all measurements. A wire stirrer was used to ensure fresh sample volume was continuously used during the measurement.

## Absorption Spectra

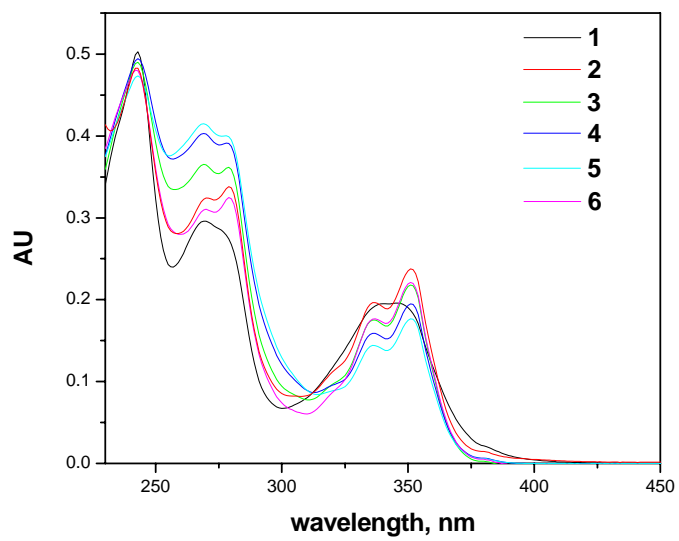

**Figure A.** Absorption spectra of ureas **1-6** in acetonitrile.



## Transient Spectra

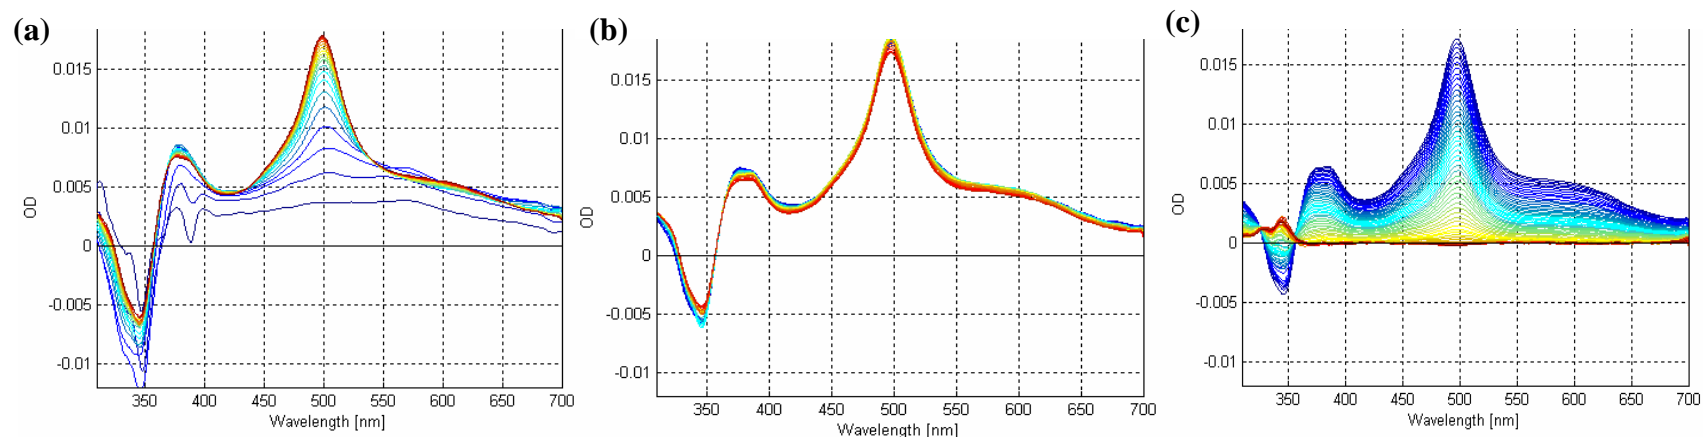

**Figure B.** Temporal evolution of the pump-probe spectra of urea **1** (a) 0-1 ps, (b) 1-5 ps, (c) 5-2000 ps in the indicated time range following 347 nm excitation in Acetonitrile. Early spectra are shown in blue/green colors and late spectra in orange/red colors.

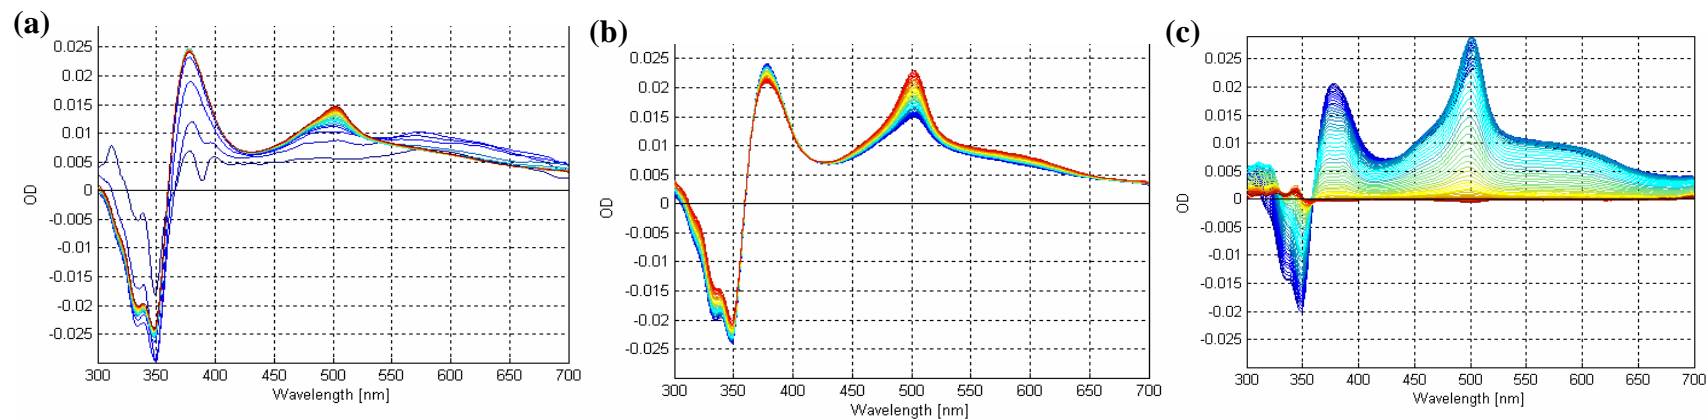

**Figure C.** Temporal evolution of the pump-probe spectra of urea **2** (a) 0-1 ps, (b) 1-5 ps, (c) 5-2000 ps in the indicated time range following 347 nm excitation in Acetonitrile. Early spectra are shown in blue/green colors and late spectra in orange/red colors.

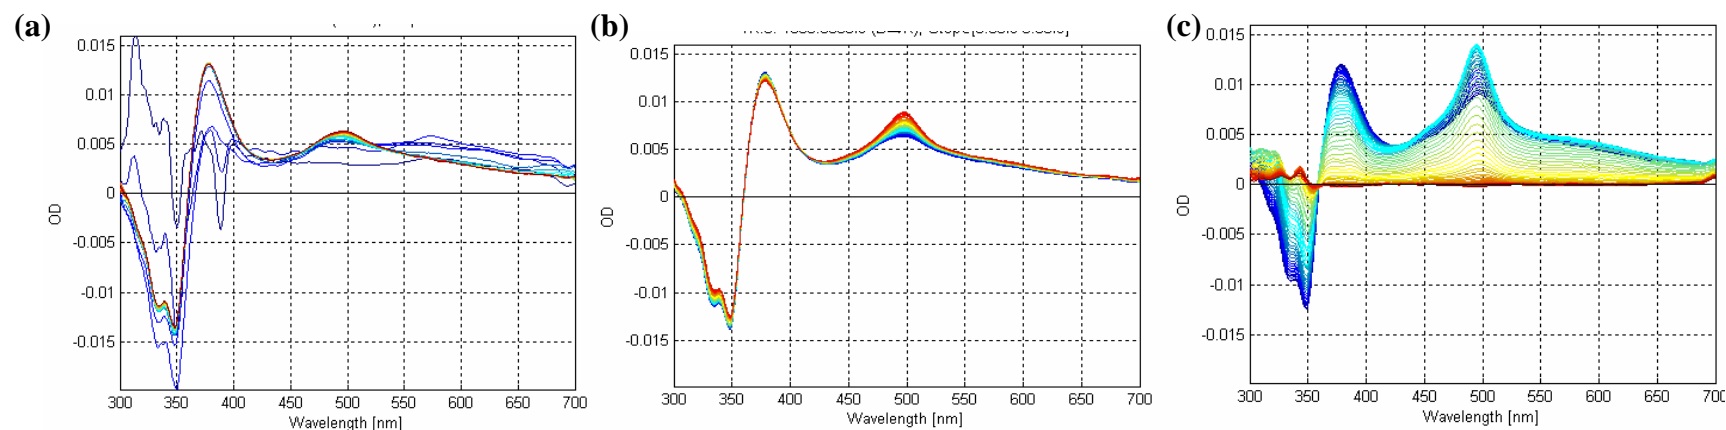

**Figure D.** Temporal evolution of the pump-probe spectra of urea **3** (a) 0-1 ps, (b) 1-5 ps, (c) 5-2000 ps in the indicated time range following 347 nm excitation in Acetonitrile. Early spectra are shown in blue/green colors and late spectra in orange/red colors.

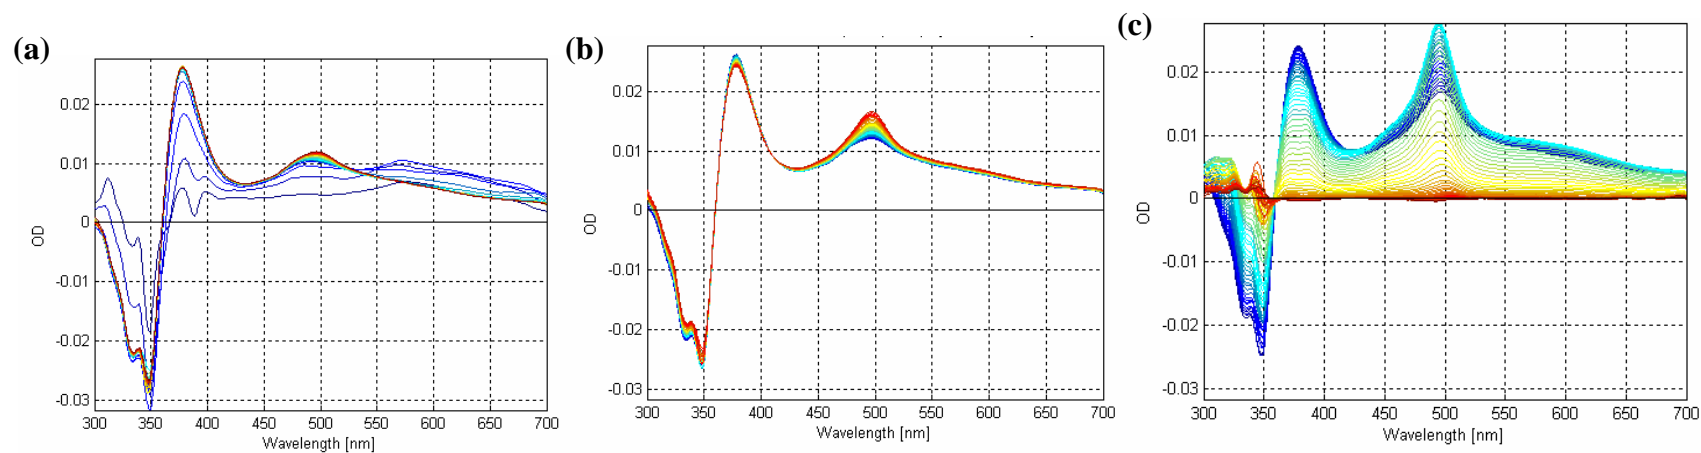

**Figure E.** Temporal evolution of the pump-probe spectra of urea **4** (a) 0-1 ps, (b) 1-5 ps, (c) 5-2000 ps in the indicated time range following 347 nm excitation in Acetonitrile. Early spectra are shown in blue/green colors and late spectra in orange/red colors.

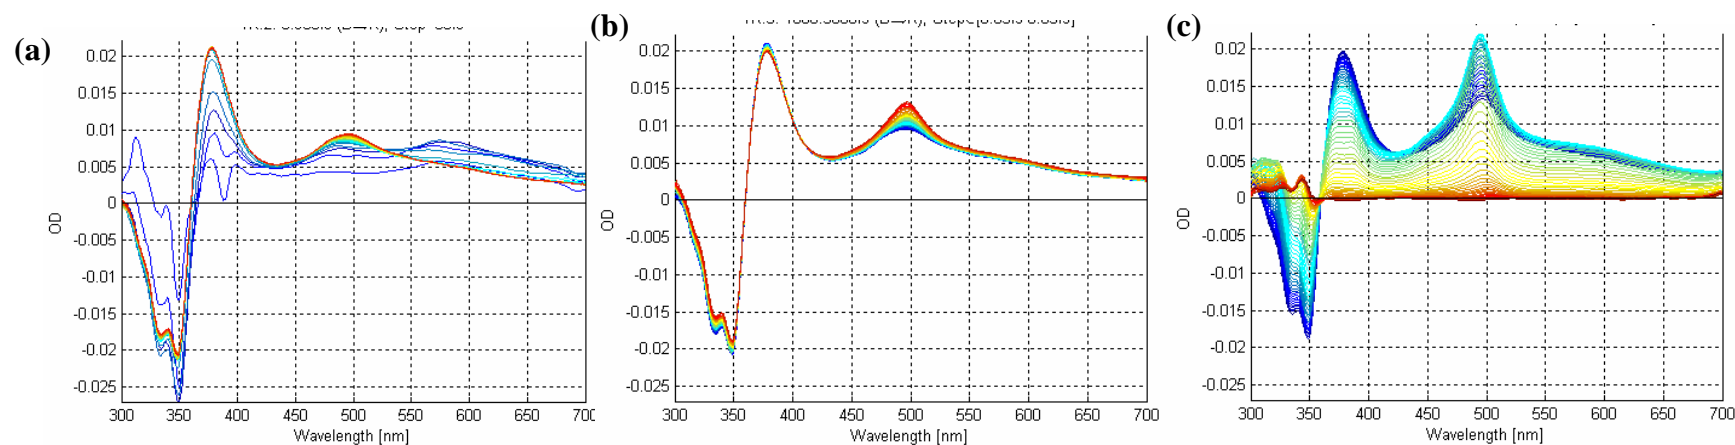

**Figure F.** Temporal evolution of the pump-probe spectra of urea **5** (a) 0-1 ps, (b) 1-5 ps, (c) 5-2000 ps in the indicated time range following 347 nm excitation in Acetonitrile. Early spectra are shown in blue/green colors and late spectra in orange/red colors.

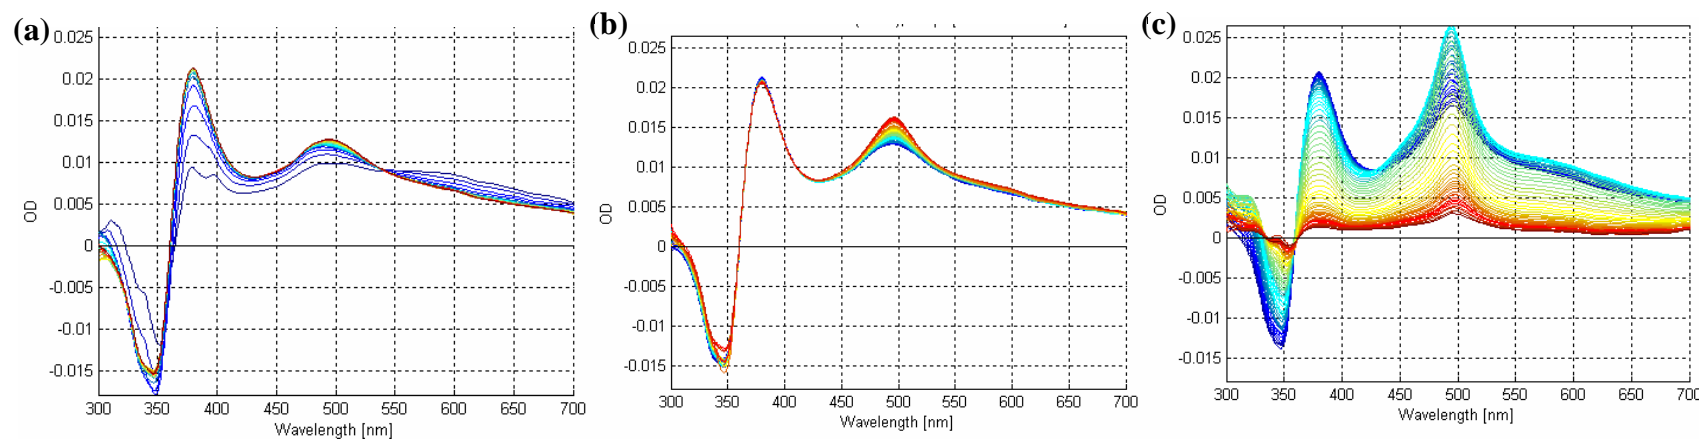

**Figure J.** Temporal evolution of the pump-probe spectra of urea **6** (a) 0-1 ps, (b) 1-5 ps, (c) 5-2000 ps in the indicated time range following 347 nm excitation in Acetonitrile. Early spectra are shown in blue/green colors and late spectra in orange/red colors.

# ZINDO Calculations

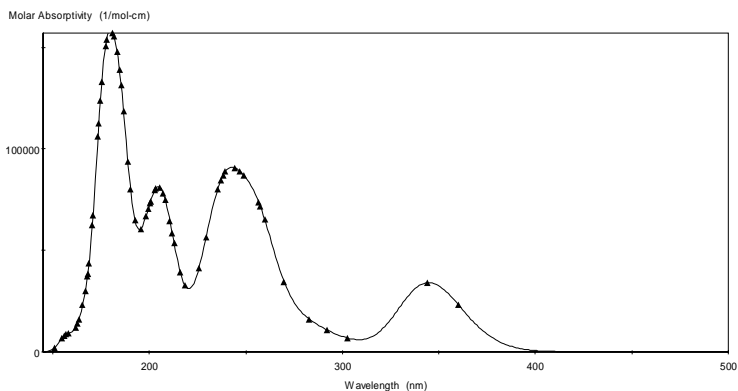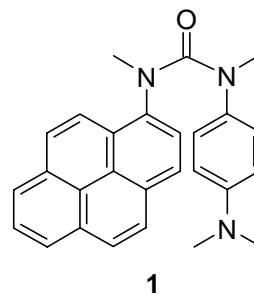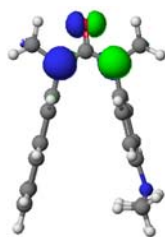

74 (HOMO-3)

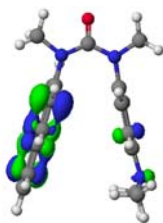

75 (HOMO-2)

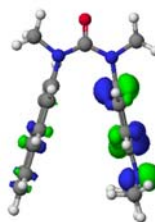

76 (HOMO-1)

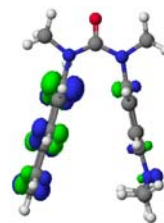

77 (HOMO)

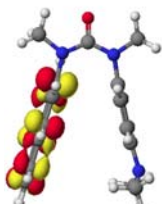

78 (LUMO)

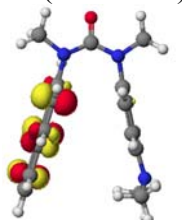

79 (LUMO+1)

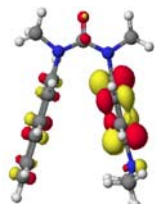

80 (LUMO+2)

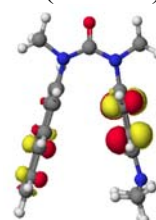

81 (LUMO+3)

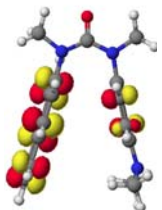

82 (LUMO+4)

AM1 minimizes geometries

S1: 360.0 nm,

75->78 -0.553

77->78 -0.272

77->79 0.714

S2: 344.0 nm,

77->78 -0.914

77->79 0.714

Transitions w/ |coeff| > 0.250, f (M<sup>-1</sup>\*cm<sup>-1</sup>)

S3: 302.4 nm,

76->81 0.466

76->83 -0.307

77->81 -0.583

S4: 292.2 nm,

76->81 0.314

77->80 -0.261

77->81 0.256

77->82 0.816

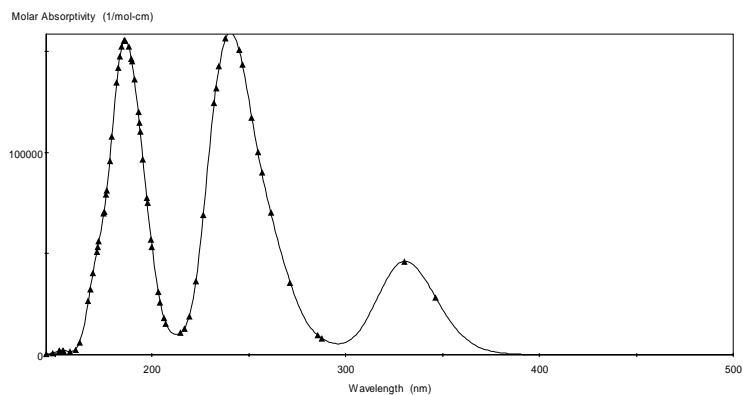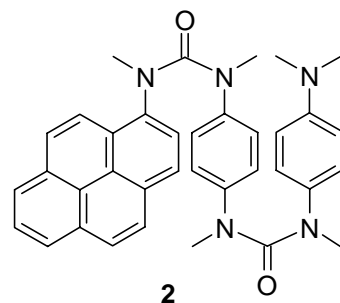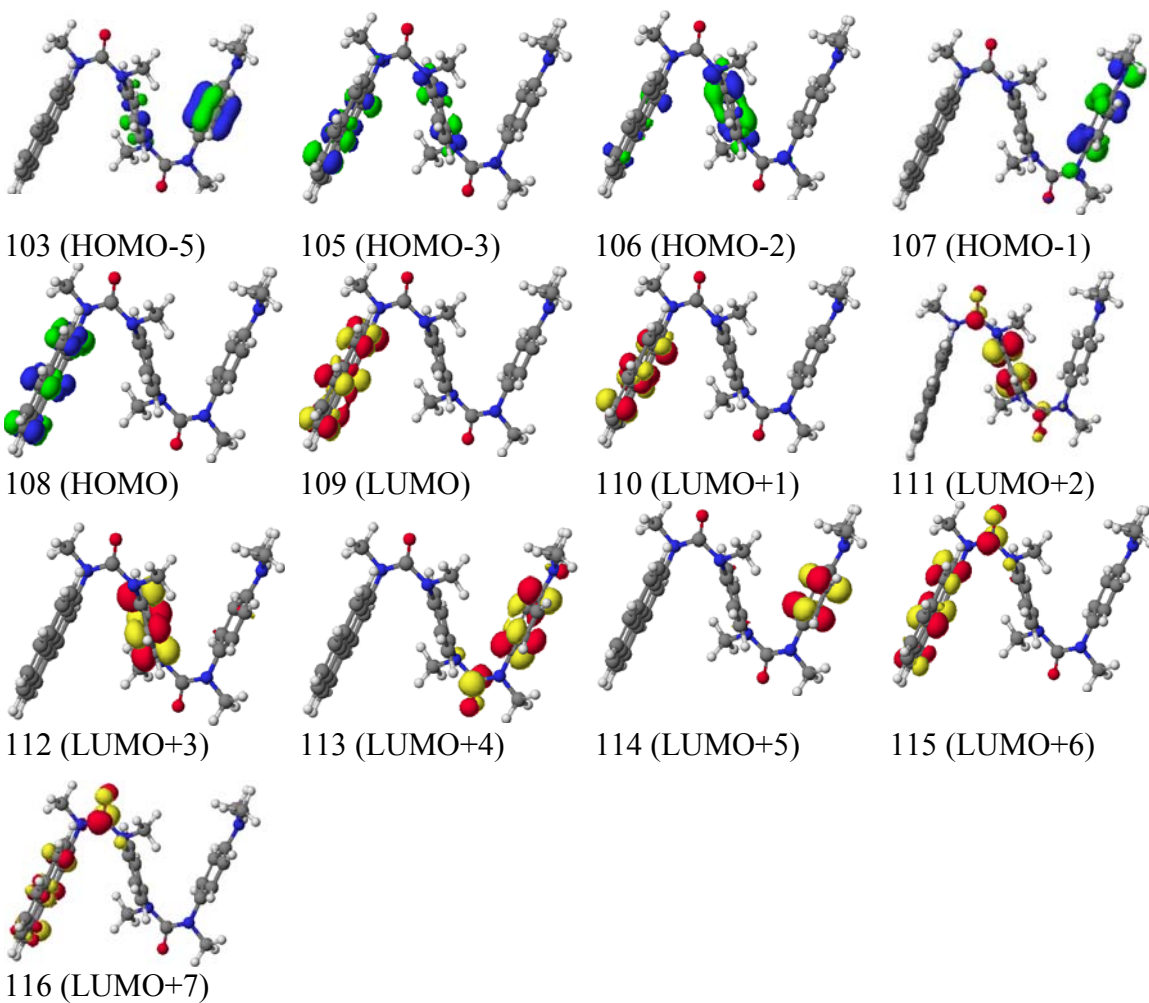

AM1 minimizes geometries

S1: 346.4 nm,

105->109 0.483

106->109 -0.387

108->110 0.759

S2: 330.4 nm,

108->109 -0.936

Transitions w/ |coeff| > 0.250, f (M<sup>-1</sup>cm<sup>-1</sup>)

S3: 287.7 nm,

103->113 0.341

107->112 0.280

107->114 0.826

S4: 285.5 nm,

108->115 0.850

108->116 -0.484

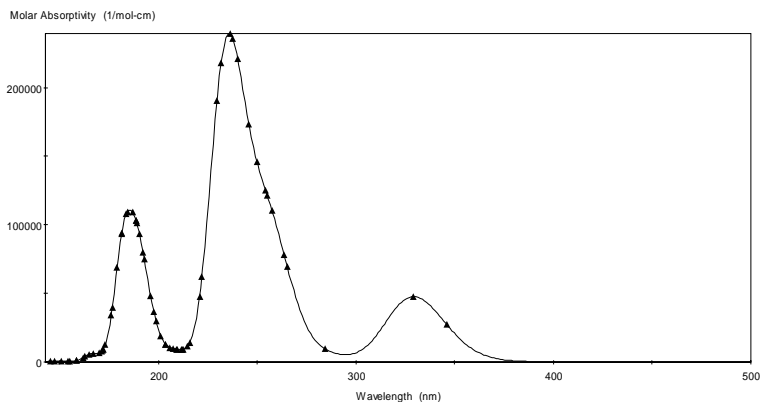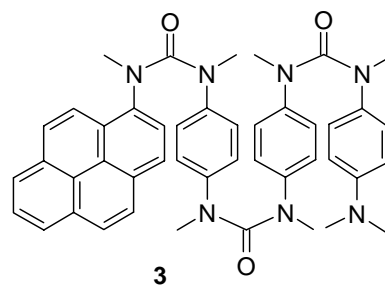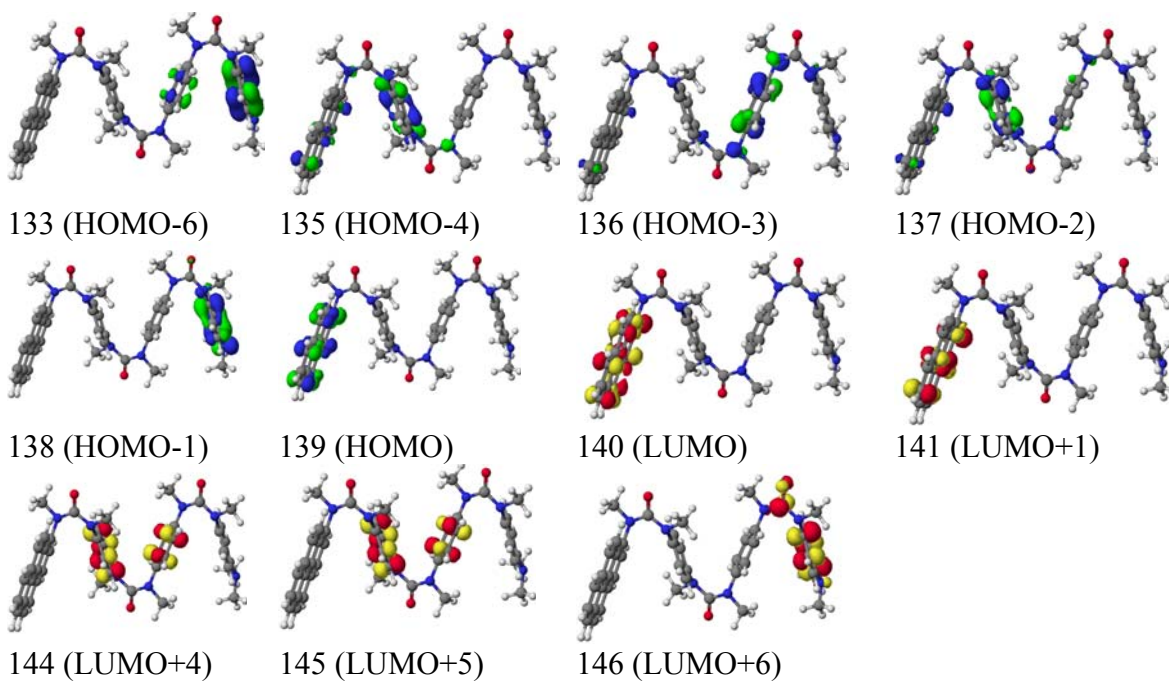

AM1 minimizes geometries

Transitions w/  $|\text{coeff}| > 0.250$ ,  $f(\text{M}^{-1}\text{cm}^{-1})$

S1: 345.9 nm,

S2: 329.1 nm,

S3: 284.3 nm,

S4: 265.2 nm,

135→140 -0.375

139→140 0.939

133→146 -0.330

135→145 0.353

136→140 -0.320

138→146 0.262

136→144 0.283

137→140 -0.378

136→145 -0.351

139→141 0.760

137→144 -0.522



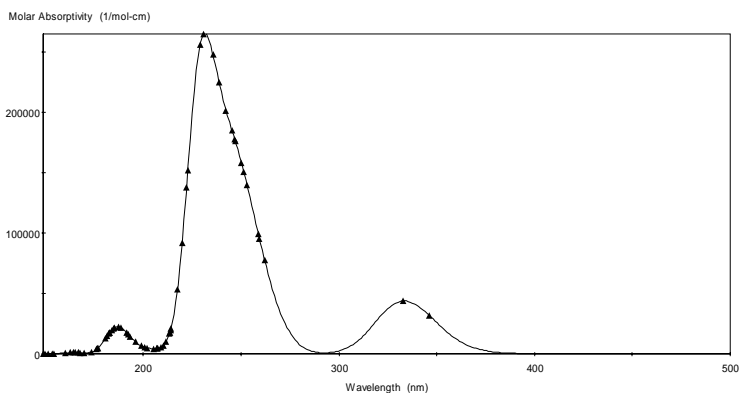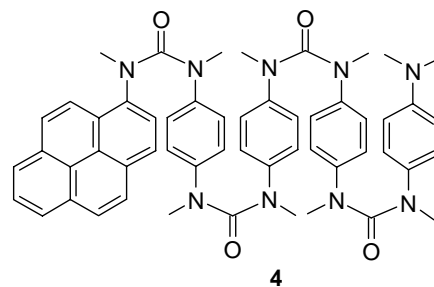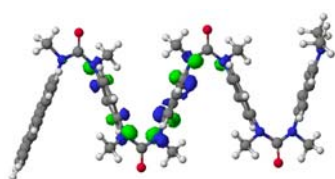

165 (HOMO-5)

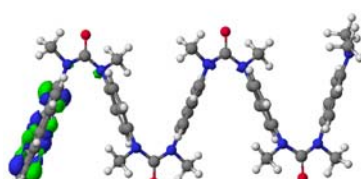

166 (HOMO-4)

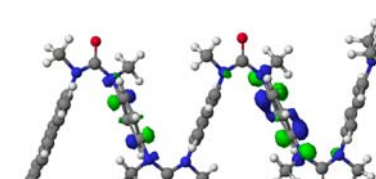

167 (HOMO-3)

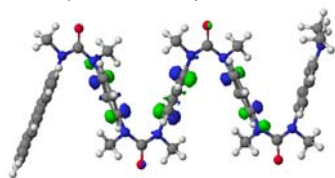

168 (HOMO-2)

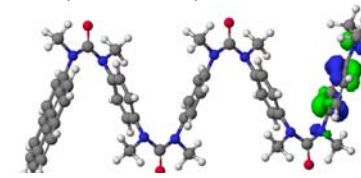

169 (HOMO-1)

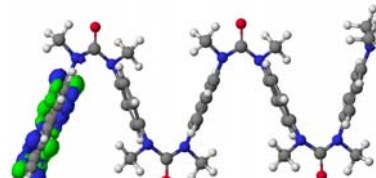

170 (HOMO)

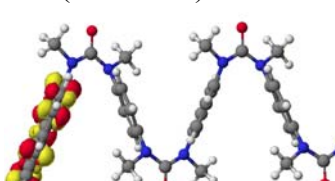

171 (LUMO)

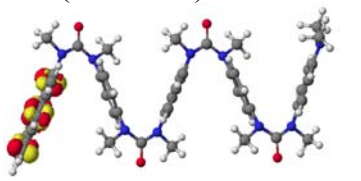

172 (LUMO+1)

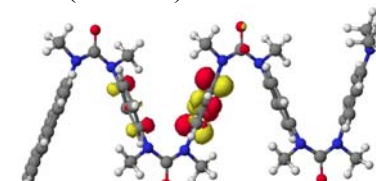

173 (LUMO+2)

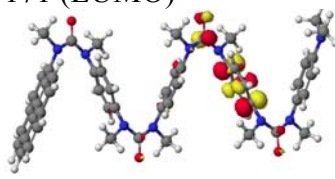

175 (LUMO+4)

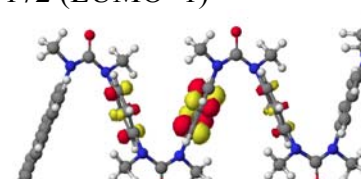

176 (LUMO+5)

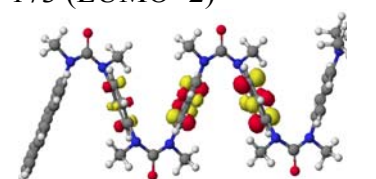

178 (LUMO+7)

AM1 minimizes geometries

Transitions w/  $|\text{coeff}| > 0.250$ ,  $f(\text{M}^{-1}\text{cm}^{-1})$

|                 |                 |                 |                 |
|-----------------|-----------------|-----------------|-----------------|
| S1: 346.2 nm,   | S2: 332.9 nm,   | S3: 262.0 nm,   | S4: 259.4 nm,   |
| 166->171 0.550  | 166->172 0.245  | 166->171 0.289  | 165->178 -0.322 |
| 170->171 -0.211 | 170->171 -0.930 | 168->173 0.283  | 167->177 0.262  |
| 170->172 -0.751 |                 | 168->176 -0.274 | 168->173 -0.347 |
|                 |                 | 170->172 -0.307 | 168->176 -0.471 |

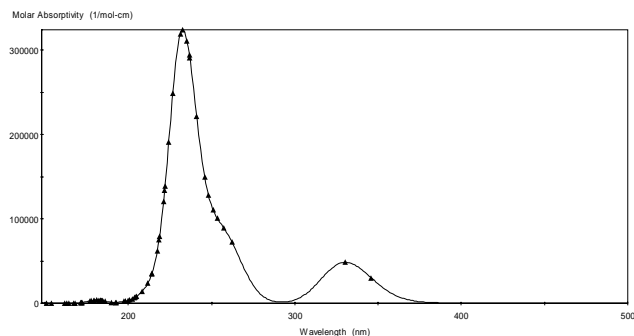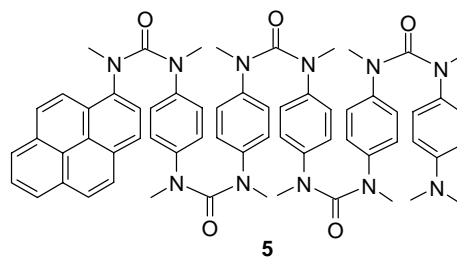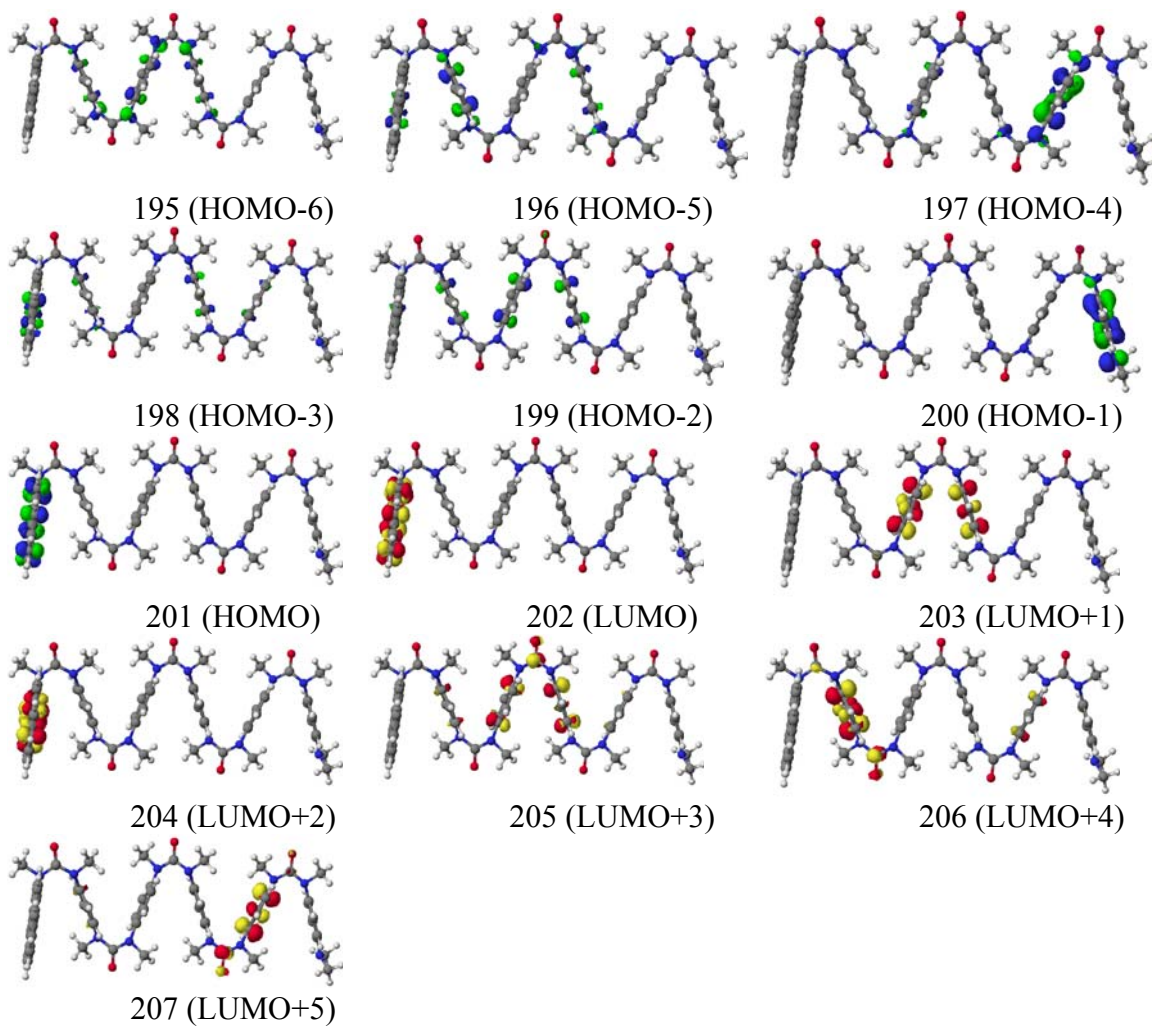

AM1 minimizes geometries

S1: 345.9 nm,

S2: 330.0 nm,

Transitions w/  $|\text{coeff}| > 0.250$ ,  $f(\text{M}^{-1} \cdot \text{cm}^{-1})$

S3: 262.1 nm,

S4: 257.4 nm,

196->202 0.308

201->202 0.937

195->206 0.270

197->207 0.304

198->202 0.409

196->205 -0.264

198->202 -0.329

199->202 0.269

199->203 0.412

201->206 0.254

201->204 0.764

201->206 -0.307



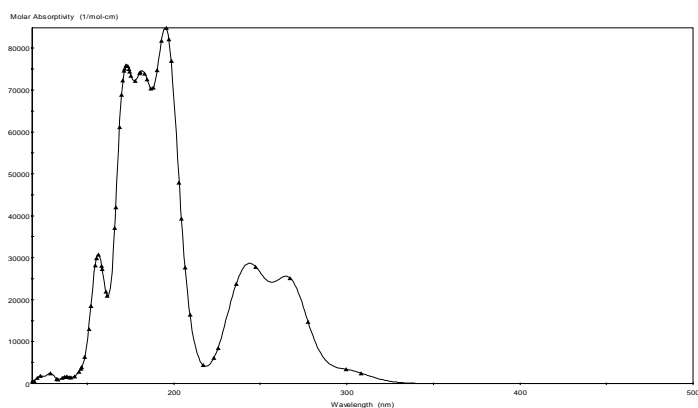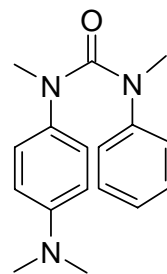

7

|             |             |             |             |
|-------------|-------------|-------------|-------------|
|             |             |             |             |
| 49 (HOMO-6) | 50 (HOMO-5) | 51 (HOMO-4) | 52 (HOMO-3) |
|             |             |             |             |
| 53 (HOMO-2) | 54 (HOMO-1) | 55 (HOMO)   | 56 (LUMO)   |
|             |             |             |             |
| 57 (LUMO+1) | 58 (LUMO+2) | 59 (LUMO+3) | 60 (LUMO+4) |

AM1 minimizes geometries

S1:360.0 nm, 49->57 -0.238  
 S1:360.0 nm, 49->60 0.387  
 S1:360.0 nm, 50->56 0.264  
 S1:360.0 nm, 50->57 -0.264  
 S1:360.0 nm, 50->60 -0.264  
 S1:360.0 nm, 51->56 -0.264  
 S1:360.0 nm, 51->57 -0.264  
 S1:360.0 nm, 51->60 -0.264

Transitions w/ |coeff| > 0.250, f (M<sup>-1</sup>cm<sup>-1</sup>)

S1:360.0 nm, 77->78 -0.914  
 S1:360.0 nm, 77->79 0.714  
 S1:360.0 nm, 76->81 0.466  
 S1:360.0 nm, 76->83 -0.307  
 S1:360.0 nm, 77->81 -0.583  
 S1:360.0 nm, 76->81 0.314  
 S1:360.0 nm, 77->80 -0.261  
 S1:360.0 nm, 77->81 0.256

# NMR Spectra

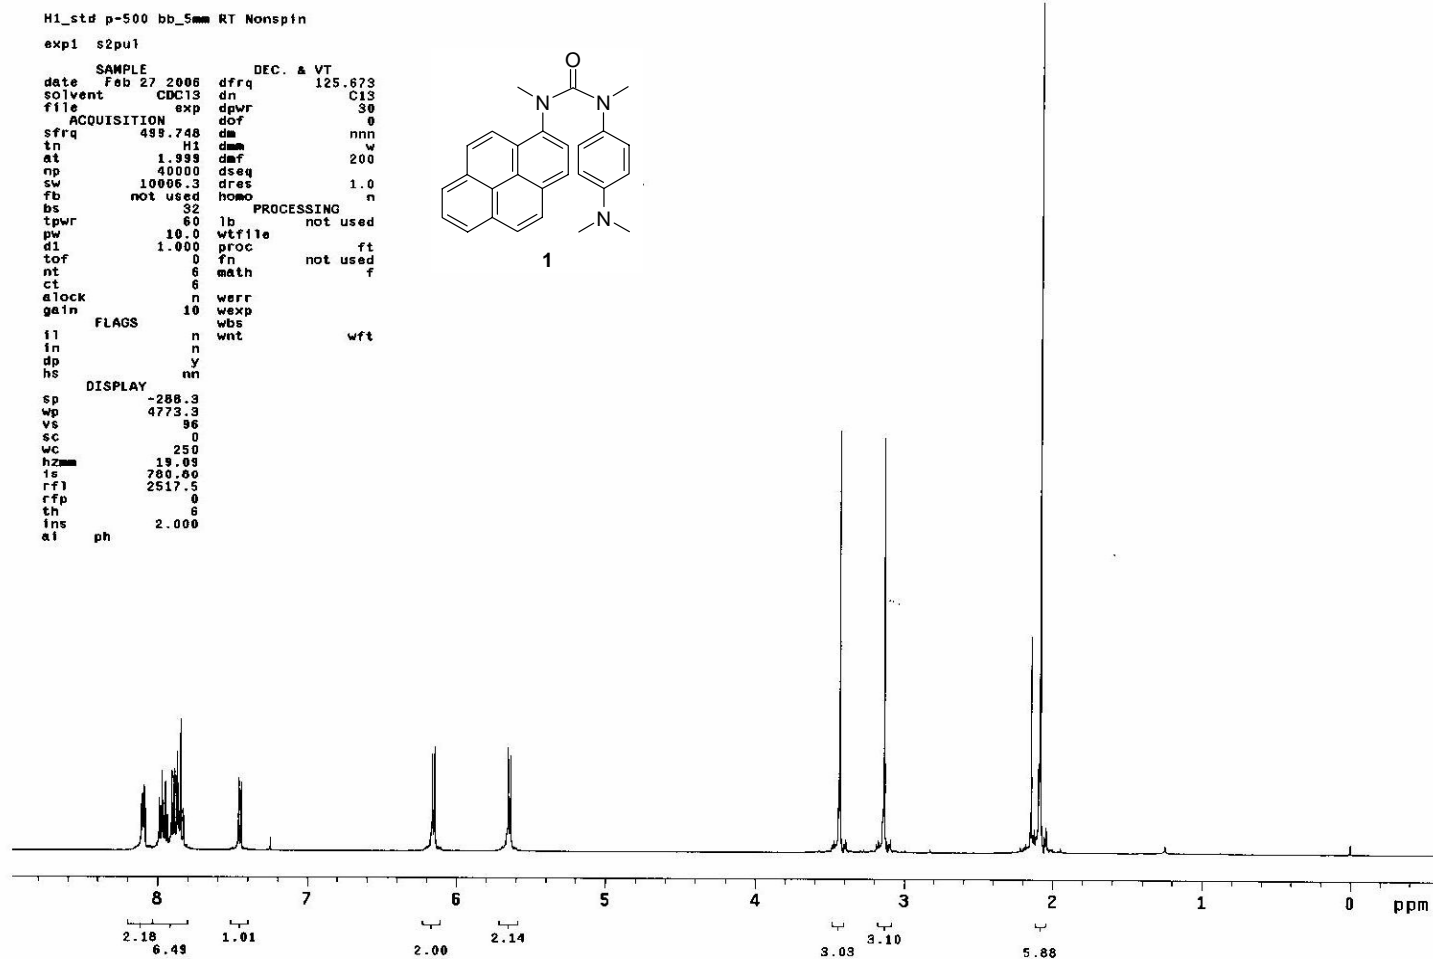

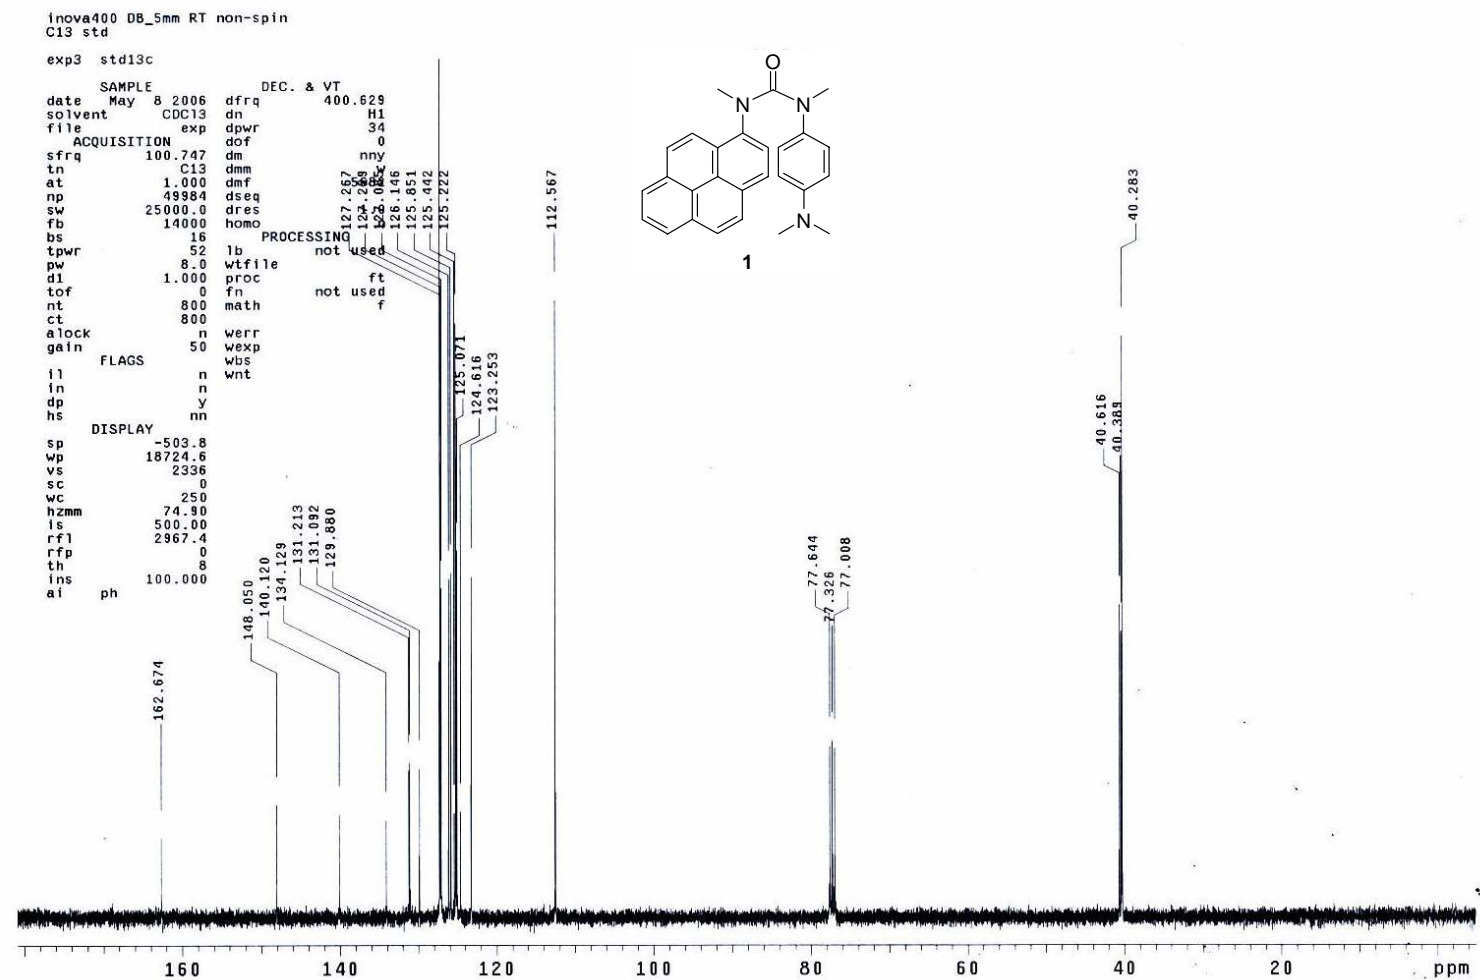

## STANDARD 1H OBSERVE

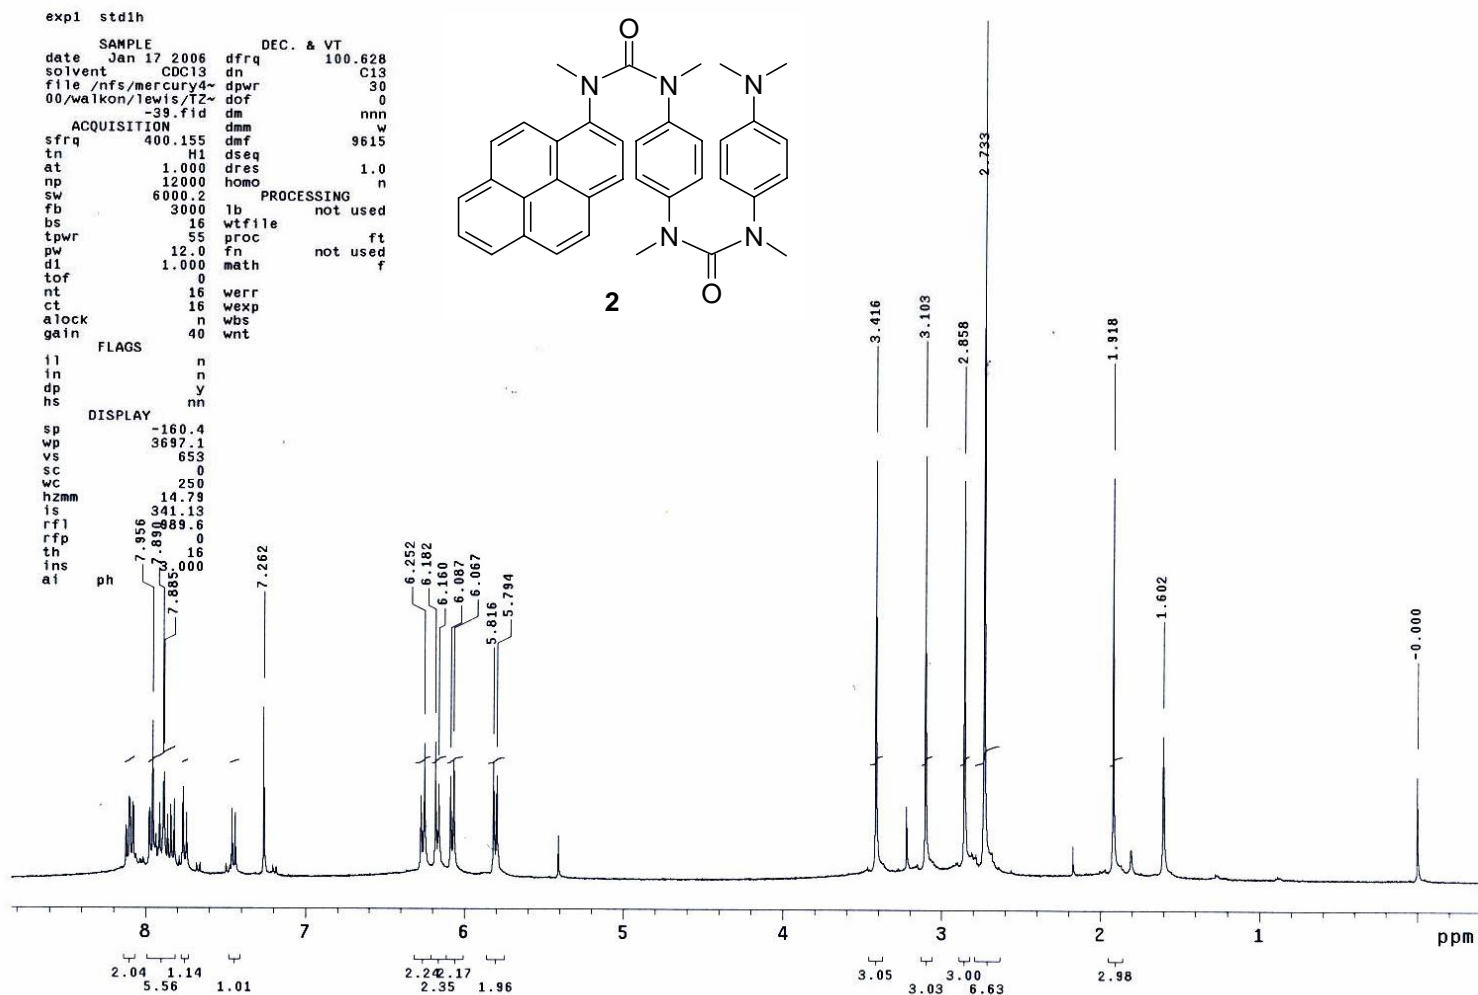

inova400 DB\_5mm RT non-spin  
C13 std

exp1 std13c

|             |            |            |          |
|-------------|------------|------------|----------|
| SAMPLE      |            | DEC. & VT  |          |
| date        | May 8 2006 | dfrq       | 400.629  |
| solvent     | CDC13      | dn         | H1       |
| file        | exp        | dpwr       | 34       |
| ACQUISITION |            | dof        | 0        |
| sfrq        | 100.747    | dm         | nny      |
| tn          | C13        | dmm        | w        |
| at          | 1.000      | dmf        | 5682     |
| np          | 49984      | dseq       |          |
| sw          | 25000.0    | dres       | 1.0      |
| fb          | 14000      | homo       | n        |
| bs          | 16         | PROCESSING |          |
| tpwr        | 52         | lb         | 1.00     |
| pw          | 8.0        | wtfile     |          |
| d1          | 1.000      | proc       | ft       |
| tof         | 0          | fn         | not used |
| nt          | 1500       | math       | f        |
| ct          | 1500       |            |          |
| elock       | n          | verr       |          |
| gain        | 50         | wexp       |          |
| FLAGS       |            | wbs        |          |
| il          | n          | wnt        |          |
| in          | n          |            |          |
| dp          | y          |            |          |
| hs          | nn         |            |          |
| DISPLAY     |            |            |          |
| sp          | -2967.4    |            |          |
| wp          | 25000.0    |            |          |
| vs          | 17005      |            |          |
| sc          | 0          |            |          |
| wc          | 250        |            |          |
| hzmm        | 100.00     |            |          |
| is          | 500.00     |            |          |
| rfl         | 2967.4     |            |          |
| rfp         | 0          |            |          |
| th          | 7          |            |          |
| ins         | 100.000    |            |          |
| al          | ph         |            |          |

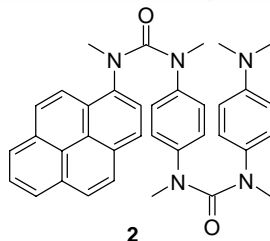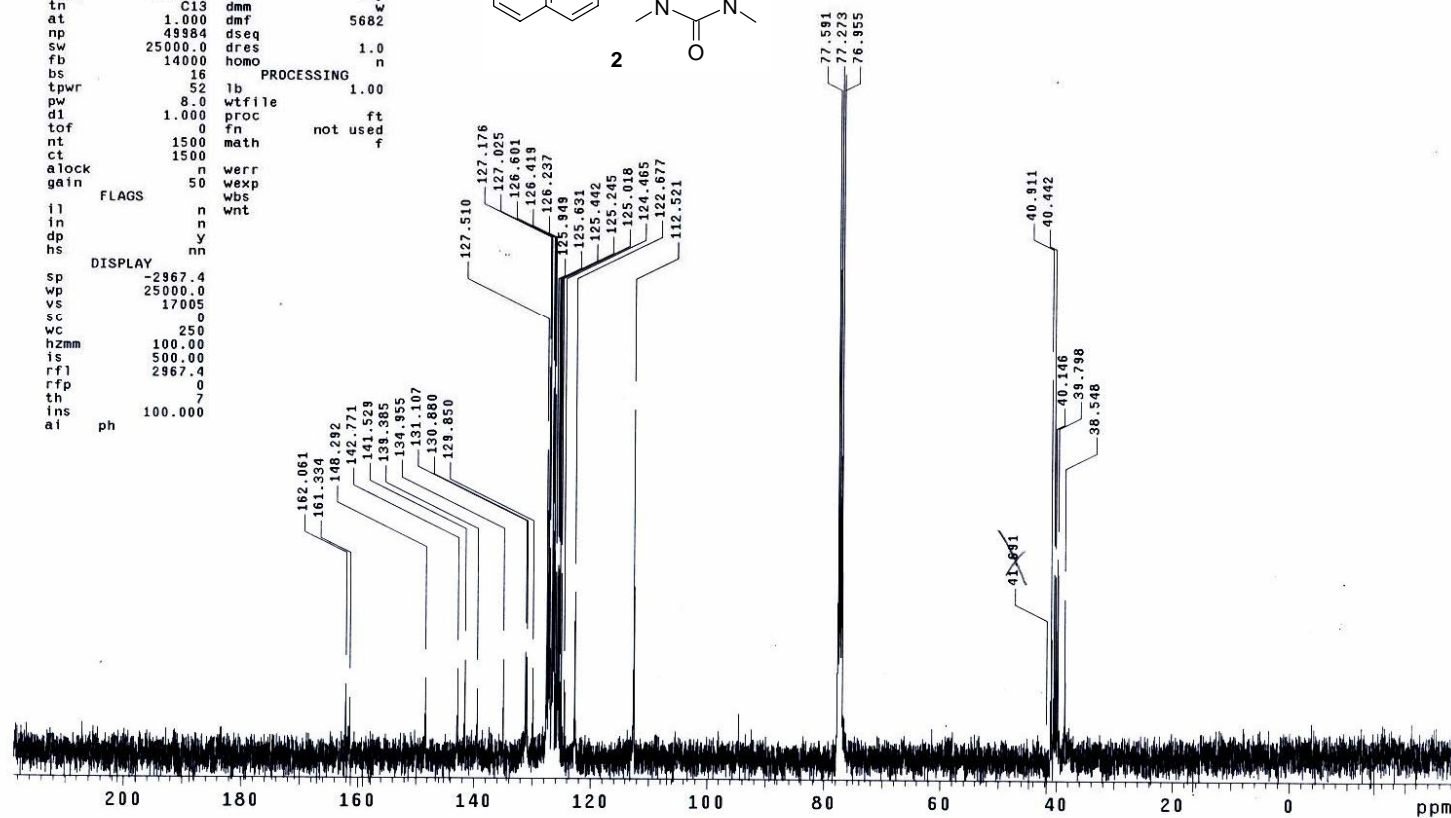

H1\_std p-500 bb\_5mm RT Nonspin

exp3 s2pu1

|             |            |            |          |
|-------------|------------|------------|----------|
| SAMPLE      |            | DEC. & VT  |          |
| date        | Mar 1 2006 | dfrq       | 125.673  |
| solvent     | CDC13      | dn         | C13      |
| file        | exp        | dpwr       | 30       |
| ACQUISITION |            | dof        | 0        |
| sfrq        | 499.748    | dm         | nnn      |
| tn          | H1         | dmm        | w        |
| at          | 1.999      | dmf        | 200      |
| np          | 40000      | dseq       |          |
| sw          | 10006.3    | dres       | 1.0      |
| fb          | not used   | homo       | n        |
| bs          | 32         | PROCESSING |          |
| tpwr        | 60         | lb         | not used |
| pw          | 10.0       | wtfile     |          |
| d1          | 1.000      | proc       | ft       |
| tof         | 0          | fn         | not used |
| nt          | 6          | math       | f        |
| ct          | 6          |            |          |
| alock       | n          | werr       |          |
| gain        | 10         | wexp       |          |
|             |            | wbs        |          |
| FLAGS       | n          | wnt        | wft      |
| in          | n          |            |          |
| dp          | y          |            |          |
| hs          | nn         |            |          |
| DISPLAY     |            |            |          |
| sp          | -210.4     |            |          |
| wp          | 4681.7     |            |          |
| vs          | 1869       |            |          |
| sc          | 0          |            |          |
| wc          | 250        |            |          |
| hzmm        | 18.73      |            |          |
| is          | 13634.66   |            |          |
| rft         | 2505.3     |            |          |
| rfp         | 0          |            |          |
| th          | 2          |            |          |
| ins         | 3.000      |            |          |
| ai          | ph         |            |          |

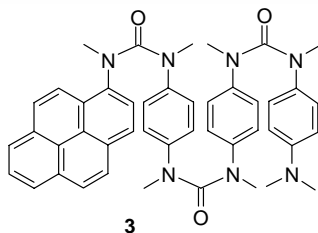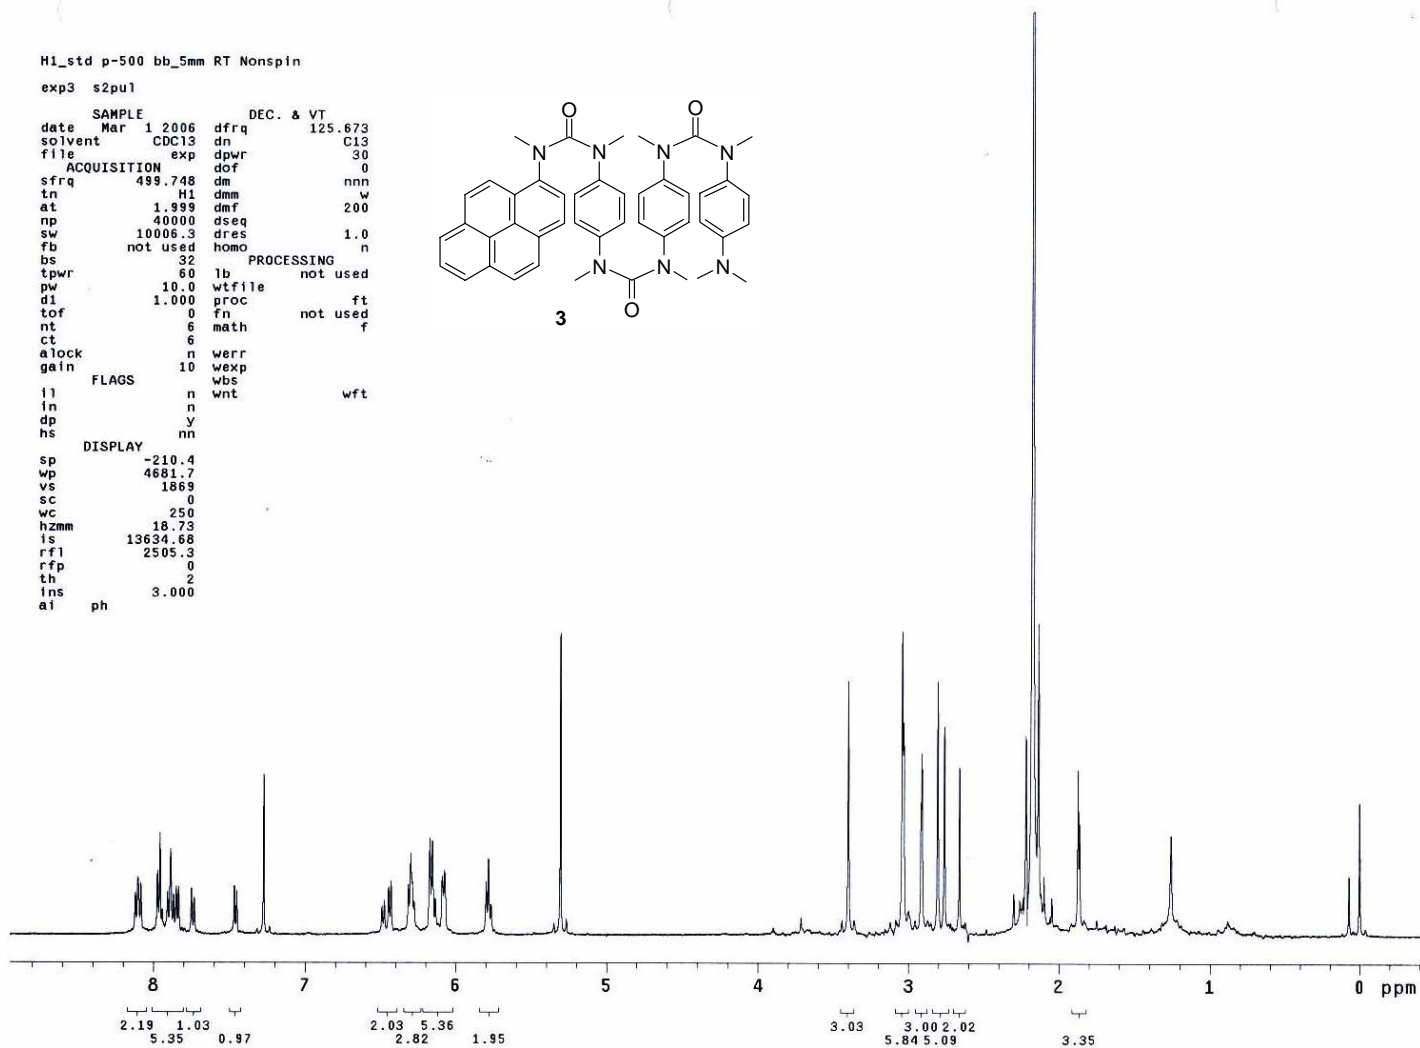

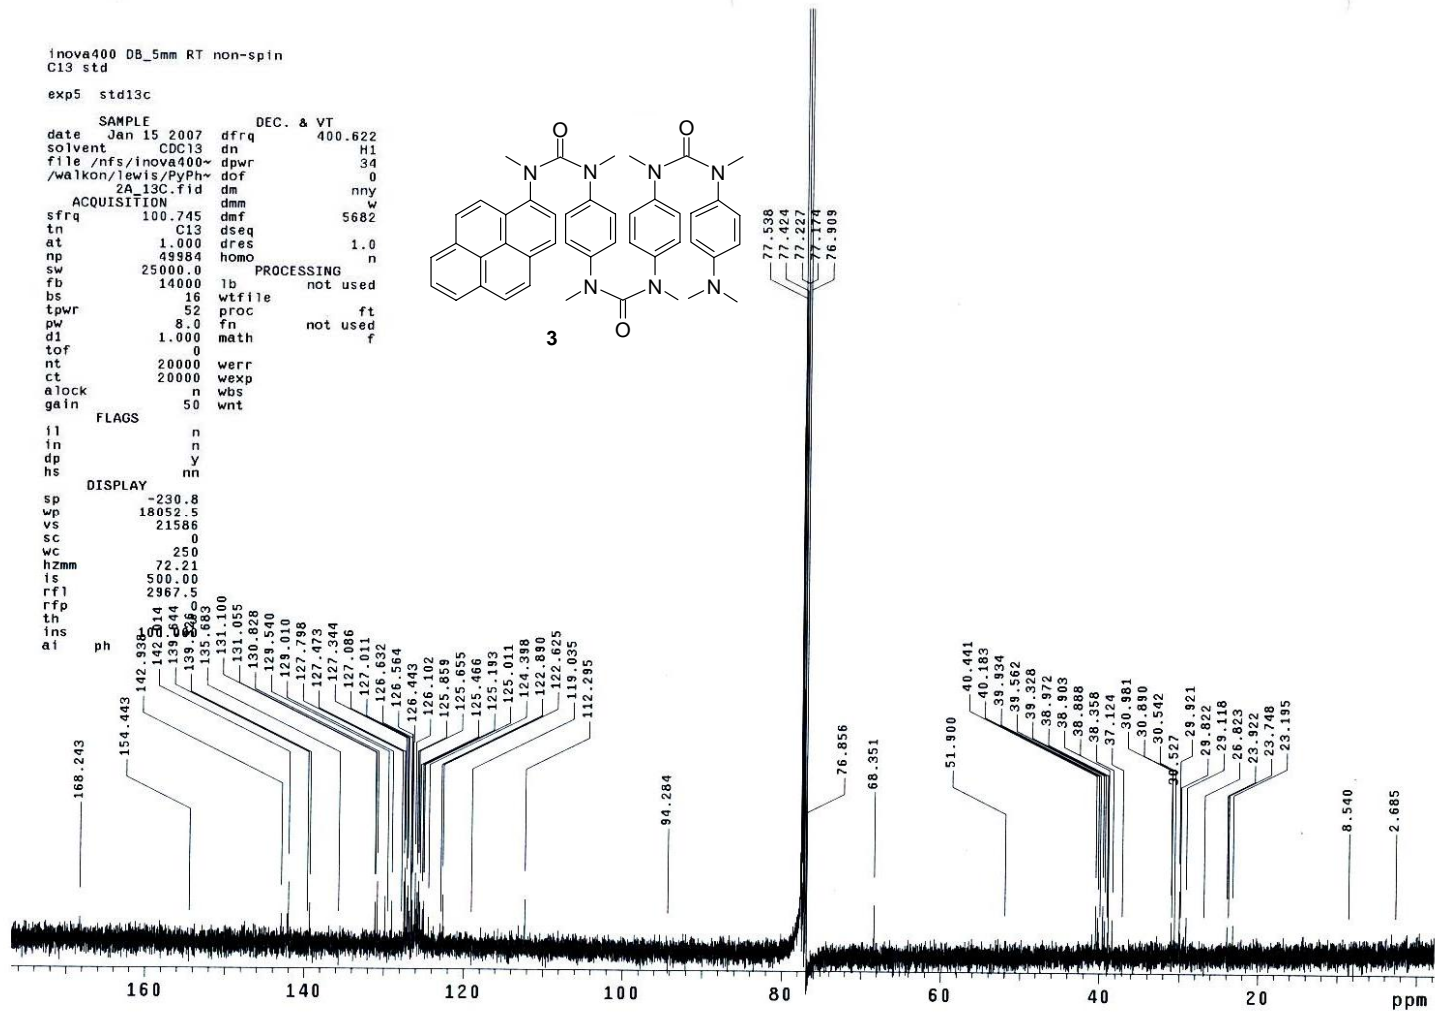

H1\_std p-500 bb\_5mm RT Nonspin

exp1 s2pu1

|             |             |            |          |
|-------------|-------------|------------|----------|
| SAMPLE      |             | DEC. & VT  |          |
| date        | Feb 15 2006 | dfrq       | 125.673  |
| solvent     | CDC13       | dn         | C13      |
| file        | exp         | dpwr       | 30       |
| ACQUISITION |             | dof        | 0        |
| sfrq        | 499.748     | dm         | nnn      |
| tn          | H1          | dmm        | w        |
| at          | 1.999       | dmf        | 200      |
| np          | 40000       | dseq       |          |
| sw          | 10006.3     | dres       | 1.0      |
| fb          | not used    | homo       | n        |
| bs          | 32          | PROCESSING |          |
| tpwr        | 60          | lb         | not used |
| pw          | 10.0        | wtfile     |          |
| d1          | 1.000       | proc       | ft       |
| tof         | 0           | fn         | not used |
| nt          | 6           | math       | f        |
| ct          | 6           |            |          |
| alock       | n           | werr       |          |
| gain        | 10          | wexp       |          |
| FLAGS       |             | wbs        |          |
| il          | n           | wnt        | wft      |
| in          | n           |            |          |
| dp          | y           |            |          |
| hs          | nn          |            |          |
| DISPLAY     |             |            |          |
| sp          | -148.1      |            |          |
| wp          | 4461.2      |            |          |
| vs          | 380         |            |          |
| sc          | 0           |            |          |
| wc          | 250         |            |          |
| hzmm        | 17.84       |            |          |
| is          | 738.57      |            |          |
| rfl         | 2493.4      |            |          |
| rfp         | 0           |            |          |
| th          | 6           |            |          |
| ins         | 2.000       |            |          |
| ai          | ph          |            |          |

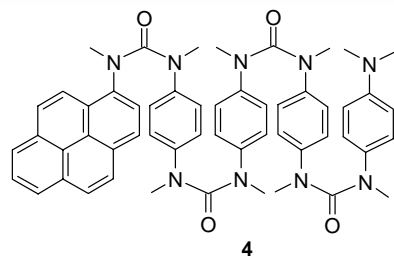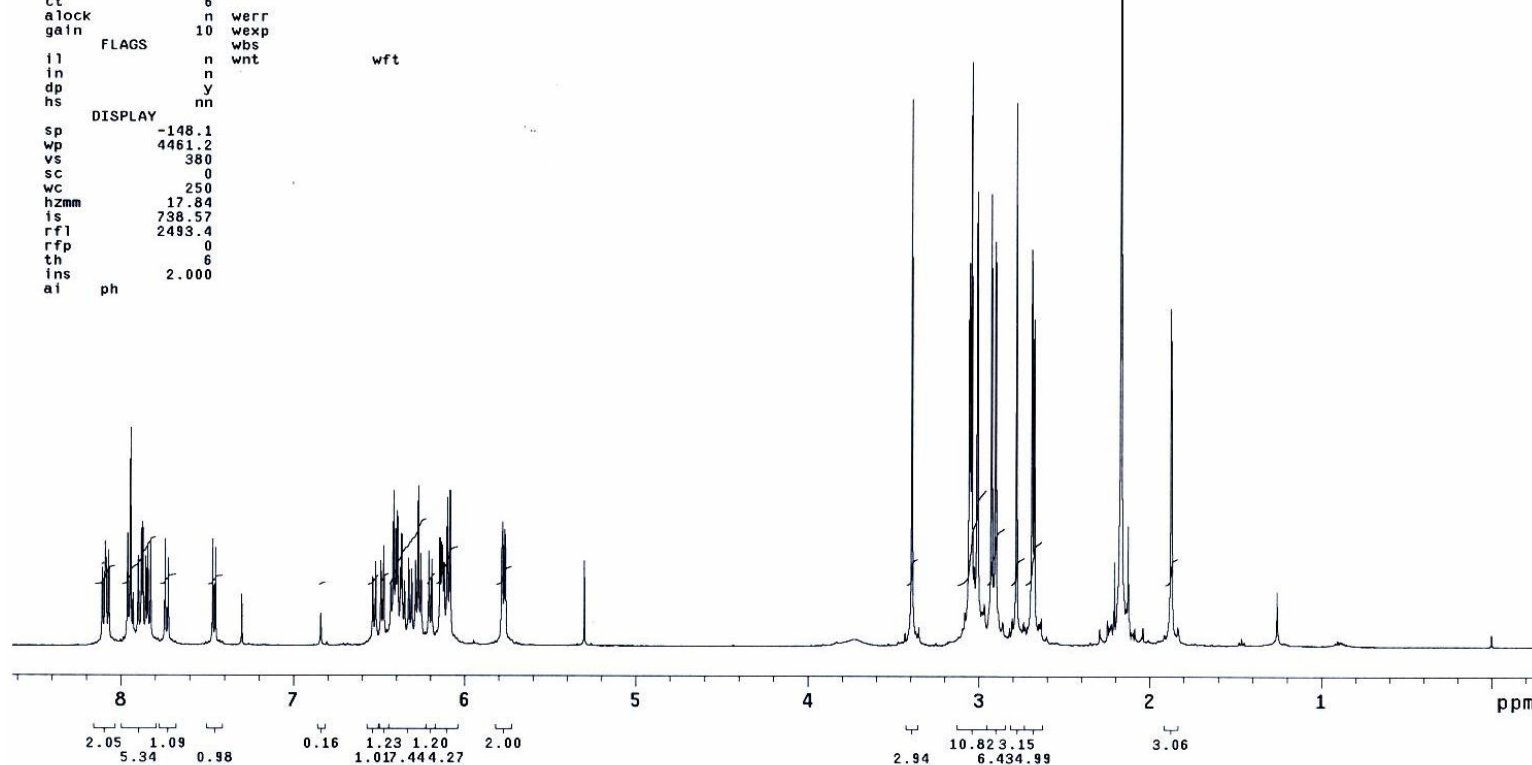



inova400 DB\_5mm RT non-spin  
C13 std

expl std13c

SAMPLE  
date May 9 2006 dfrq DEC. & VT 400.629  
solvent CDC13 dn H1  
file exp dpwr 34  
ACQUISITION dof 0  
sfrq 100.747 dm nny  
tn C13 dmm w  
at 1.000 dmf 5682  
np 49384 dseq  
sw 25000.0 dres 1.0  
fb 14000 homo n  
bs 16  
tpwr 52 lb 1.00  
pw 8.0 wtfile  
d1 1.000 proc ft  
tof 0 fn not used  
nt 3000 math f  
ct 3000  
a1ock n weff  
gain 50 wexp  
FLAGS wbs  
il n wnt  
in n  
dp y  
hs nn

DISPLAY  
sp -2967.4  
wp 25000.0  
vs 10466  
sc 0  
wc 250  
hzmm 100.00  
ls 500.00  
rfl 2967.4  
rfp 0  
th 7  
ins  
ai ph 100.000

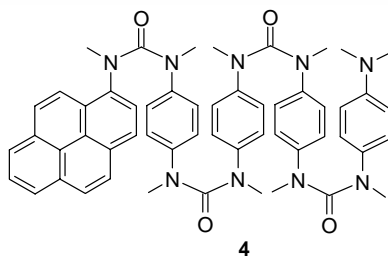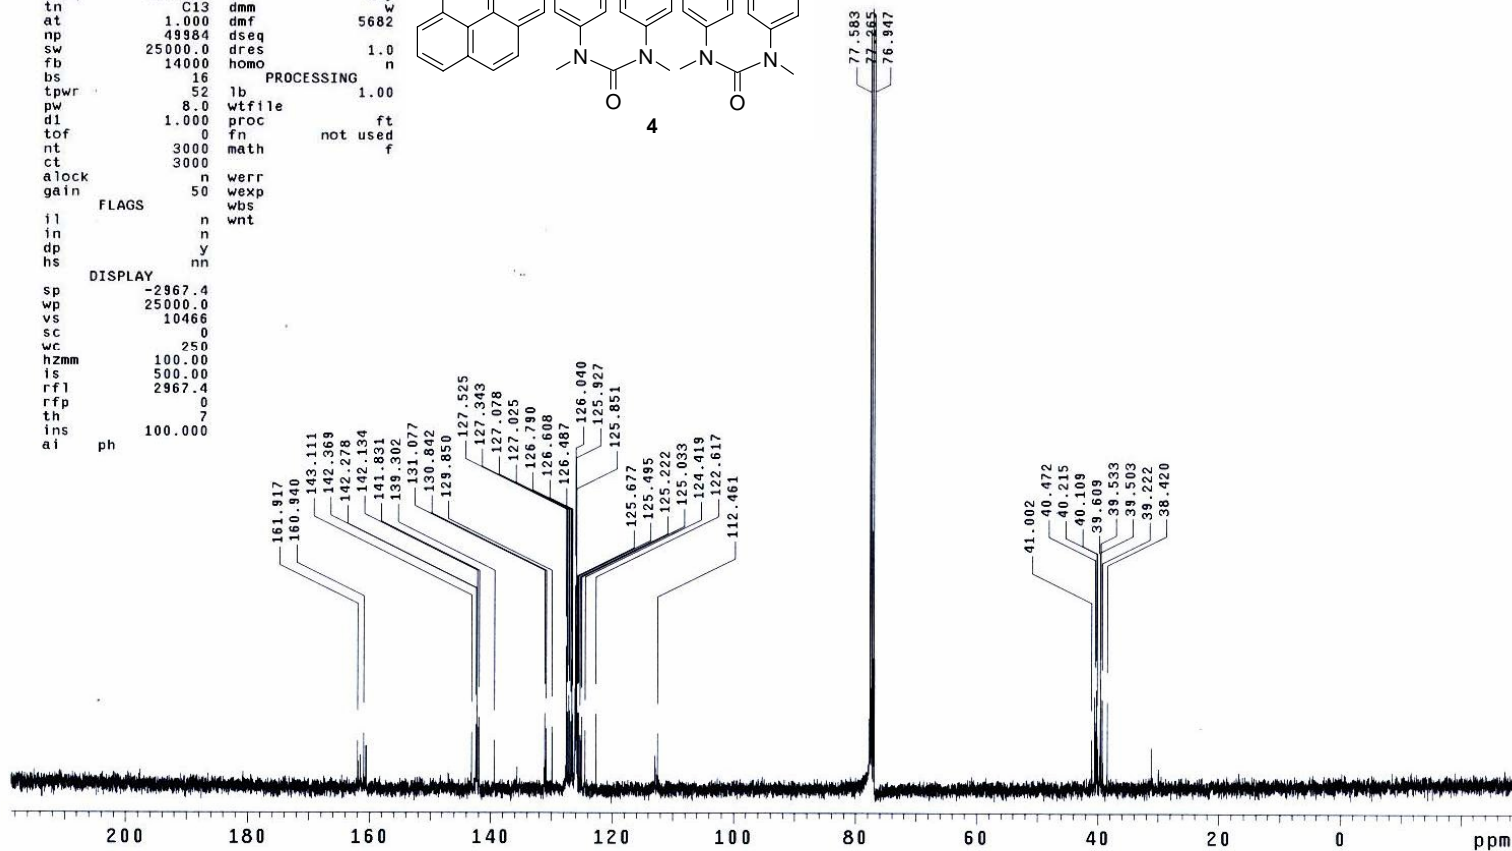

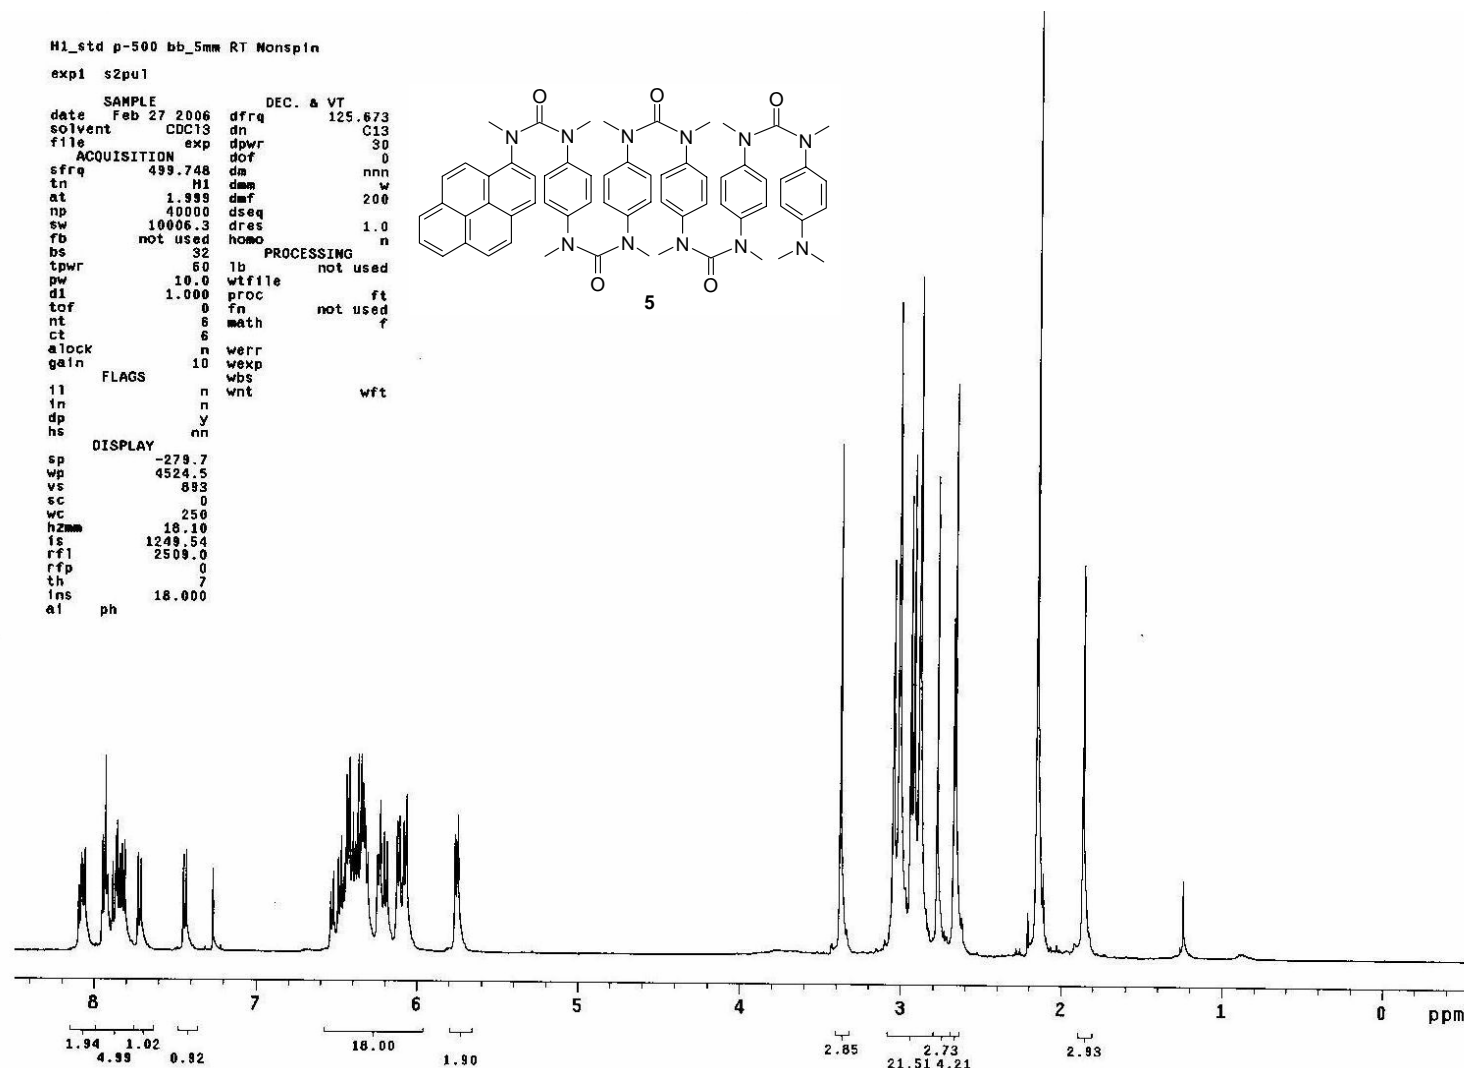

inova400 DB\_5mm RT non-spin  
C13 std

exp1 std13c

|             |            |            |          |
|-------------|------------|------------|----------|
| SAMPLE      |            | DEC. & VT  |          |
| date        | May 9 2006 | dfrq       | 400.629  |
| solvent     | CDC13      | dn         | H1       |
| file        | exp        | dpwr       | 34       |
| ACQUISITION |            | dof        | 0        |
| sfrq        | 100.747    | dm         | nny      |
| tn          | C13        | dmm        | w        |
| at          | 1.000      | dmf        | 5682     |
| np          | 49984      | dseq       |          |
| sw          | 25000.0    | dres       | 1.0      |
| fb          | 14000      | homo       | n        |
| bs          | 16         | PROCESSING |          |
| tpwr        | 52         | lb         | 1.00     |
| pw          | 8.0        | wtfile     |          |
| d1          | 1.000      | proc       | ft       |
| tof         | 0          | fn         | not used |
| nt          | 4500       | math       | r        |
| ct          | 4500       |            |          |
| alock       | n          | werr       |          |
| gain        | 50         | wexp       |          |
| FLAGS       |            | wbs        |          |
| il          | n          | wnt        |          |
| in          | n          |            |          |
| dp          | y          |            |          |
| hs          | nn         |            |          |
| DISPLAY     |            |            |          |
| sp          | -701.4     |            |          |
| wp          | 18856.6    |            |          |
| vs          | 9911       |            |          |
| sc          | 0          |            |          |
| wc          | 250        |            |          |
| hzmm        | 75.43      |            |          |
| ls          | 500.00     |            |          |
| rfl         | 2967.4     |            |          |
| rfp         | 0          |            |          |
| th          |            |            |          |
| ins         |            |            |          |
| ai          |            |            |          |

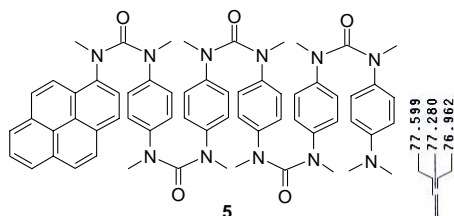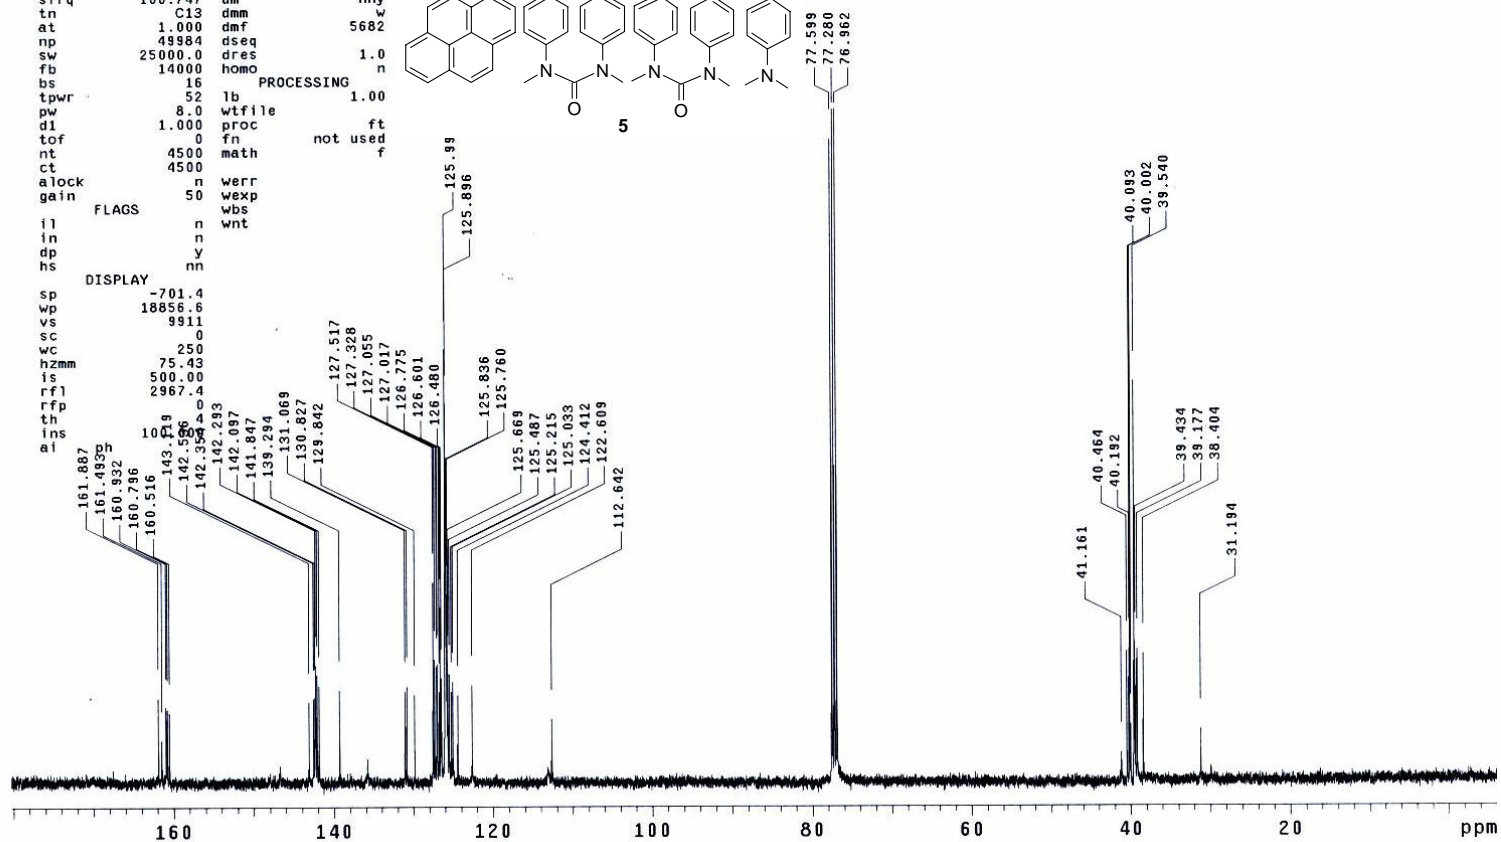

H1\_std P-inova500 H/C probe RT

exp4 s2pul

SAMPLE DEC. & VT  
 date Mar 2 2007 dfrq 125.673  
 solvent CDC13 dn C13  
 file exp dpwr 30  
 ACQUISITION dof 0  
 sfrq 499.748 dm nnn  
 tn H1 dmm w  
 at 2.000 dmf 200  
 np 40026 dseq  
 sw 10006.3 dres 1.0  
 fb not used homo n  
 bs 32 PROCESSING  
 tpwr 62 lb not used  
 pw 10.0 wtfile  
 dl 1.000 proc ft  
 tof 0 fn not used  
 nt 6 math f  
 ct 6  
 alock n werr  
 gain 10 wexp  
 FLAGS wbs  
 il n wnt  
 in n  
 dp n  
 hs n  
 DISPLAY  
 sp 8.087  
 wp 8.069  
 vs 7.958  
 sc 7.942  
 wc 7.899  
 hzmm 7.854  
 is 7.837  
 rrl 7.822  
 rfp 7.746  
 th 7.728  
 ins 7.458  
 al 8.103 ph 2.000  
 1.253  
 1.888  
 2.741  
 2.958  
 3.082  
 3.394  
 5.289  
 5.781  
 6.078  
 6.094  
 6.131  
 6.147  
 6.282  
 6.297  
 6.640  
 6.655  
 6.836  
 6.915  
 6.930  
 6.945  
 7.442  
 7.458  
 7.474  
 7.728  
 7.746  
 7.822  
 7.837  
 7.854  
 7.899  
 7.942  
 8.069  
 8.087

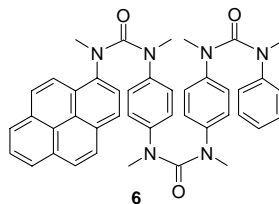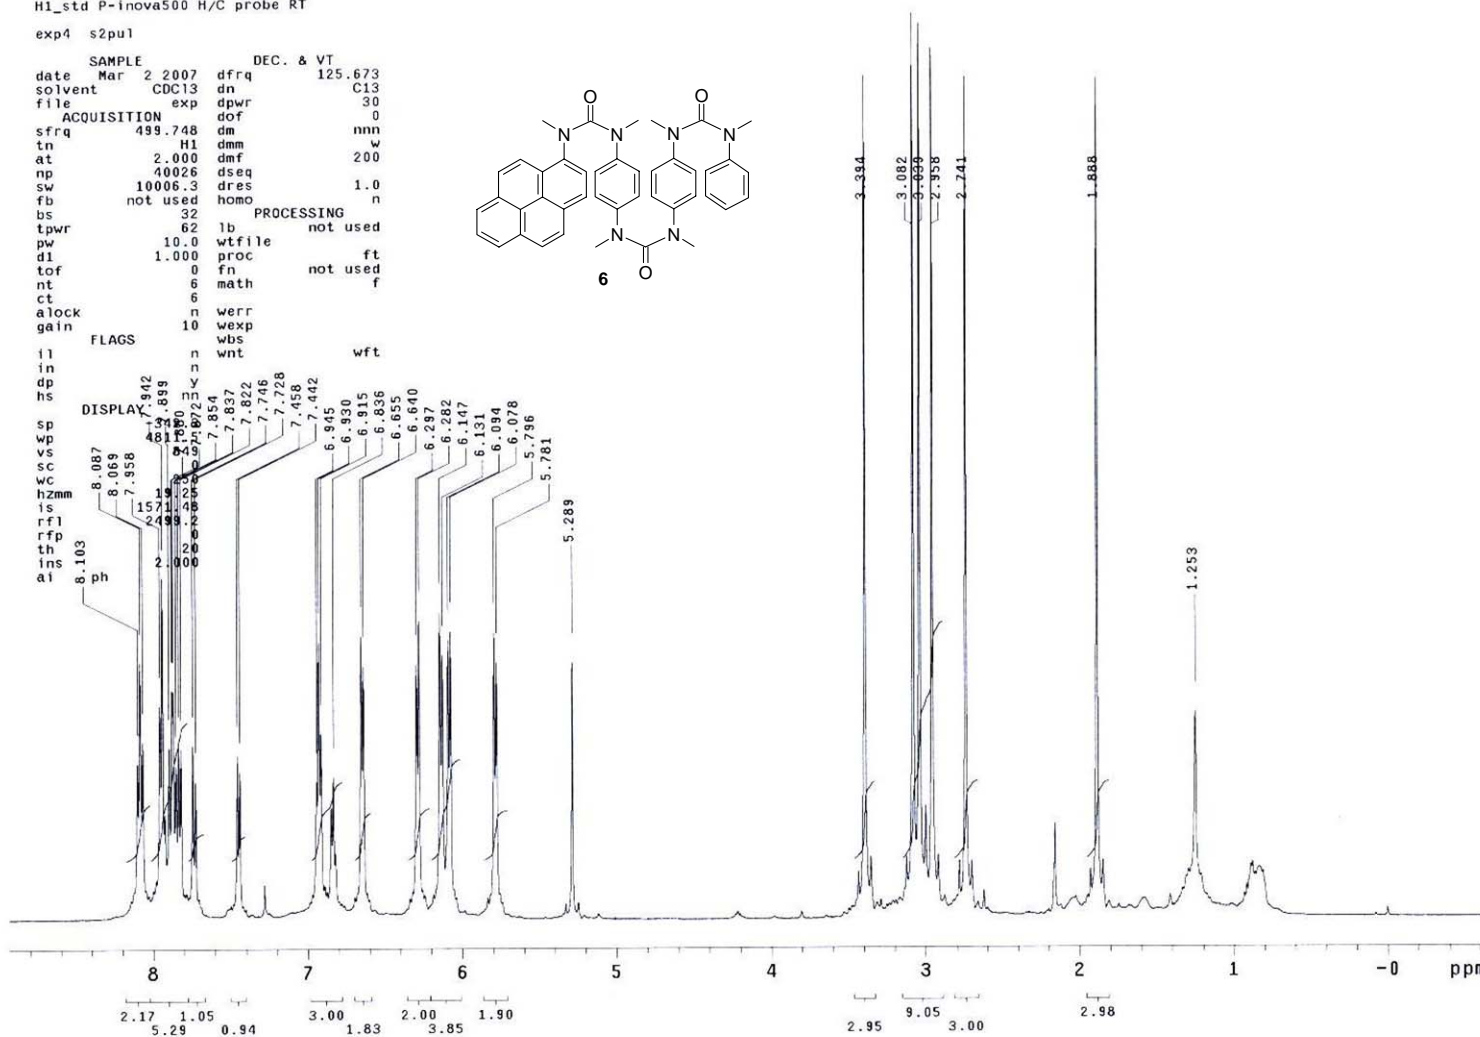

C13 std p-500 H/C probe RT

exp4 s2pu1

| SAMPLE      |            | DEC. & VT  |          |
|-------------|------------|------------|----------|
| date        | Mar 2 2007 | dfrq       | 499.748  |
| solvent     | CDC13      | dn         | H1       |
| file        | exp        | dpwr       | 38       |
| ACQUISITION |            |            |          |
| sfrq        | 125.673    | dm         | nny      |
| tn          | C13        | dmm        | w        |
| at          | 1.000      | dmf        | 3676     |
| np          | 100000     | dseq       | 1.0      |
| sw          | 50000.0    | dres       | n        |
| fb          | not used   | homo       |          |
| bs          | 64         | PROCESSING |          |
| tpwr        | 48         | lb         | not used |
| pw          | 12.0       | wtfile     |          |
| d1          | 1.000      | proc       | ft       |
| tof         | 0          | fn         | not used |
| nt          | 600        | math       | f        |
| ct          | 384        |            |          |
| alock       | not used   | werr       | n        |
| gain        |            | wexp       | n        |
|             |            | wbs        | n        |
|             |            | wnt        | n        |
| il          | n          |            |          |
| in          | n          |            |          |
| dp          | y          |            |          |
| hs          | nn         |            |          |
| DISPLAY     |            |            |          |
| sp          | -1007.6    |            |          |
| wp          | 27295.3    |            |          |
| vs          | 149        |            |          |
| sc          | 0          |            |          |
| wc          | 250        |            |          |
| hzm         | 109.18     |            |          |
| is          | 500.00     |            |          |
| rfl         | 13060.7    |            |          |
| rtp         | 0          |            |          |
| th          | 6          |            |          |
| ins         | 100.000    |            |          |
| nm          | ph         |            |          |

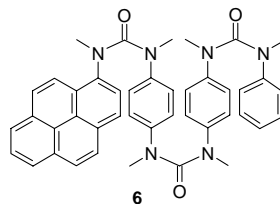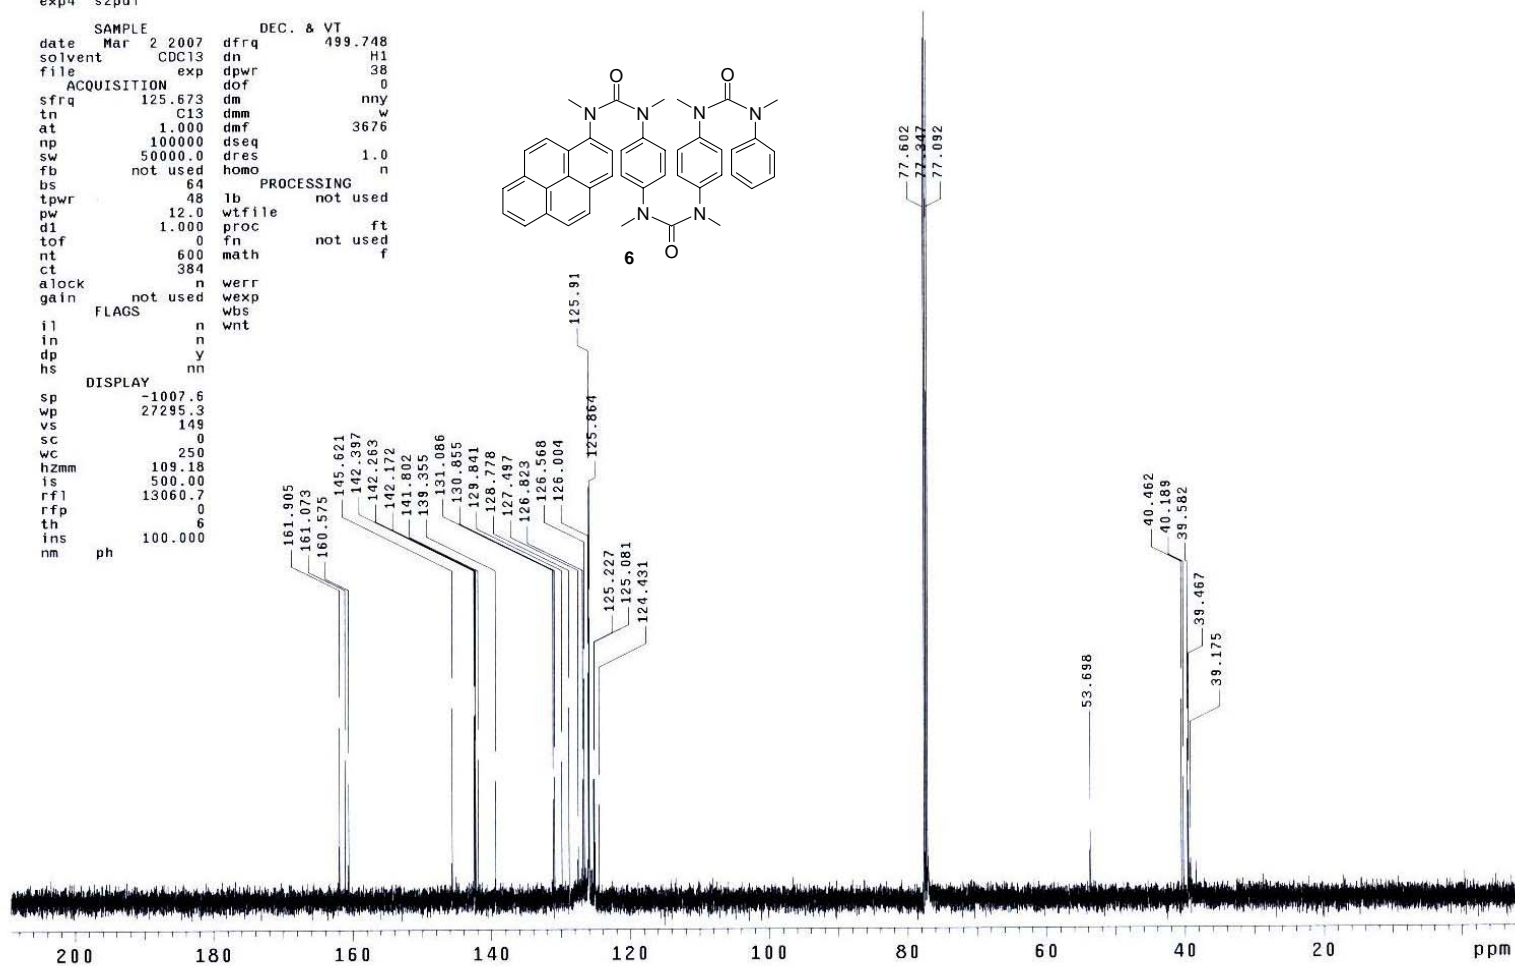

## References

1. Lewis, F. D.; Kurth, T. L.; Delos Santos, G. B. *J. Phys. Chem. B* **2005**, *109*, 4893-4899.
2. *CAChe*, Release 6.1.10; Fujitsu Ltd.: Miahama-Ku, Chiba City, Chiba, Japan, 2000-2003.
3. *Origin*, version 6.1; OriginLab Corp.: Northampton, MA, 2000.
4. Raytchev, M.; Pandurski, E.; Buchvarov, I.; Modrakowski, C.; Fiebig, T. *J. Phys. Chem. A* **2003**, *107*, 4592-4600.
